# Supplementary material for: Integrated whole exome sequencing and functional approach delineate genetic heterogeneity in cerebellar ataxias
Source: Research Square preprint supplement (doi:10.21203/rs.3.rs-757408/v1), 2021-08-02
Supplement: Supplementary file 2 [file 54e67d438f721da957d4883a.xlsx]

## Sheet: Sheet3
S.N.	Gene (Total Genes = 452)	HGNC gene name	HGNC ID	Location	Core genes	HGMD	HGMD Phenotype	OMIM	OMIM Phenotype
1	AARS2	alanyl-tRNA synthetase 2, mitochondrial	HGNC:21022	6p21.1				+	Ataxia/Ataxia without leukoencephalopathy/Cerebellar ataxia/Cerebellar atrophy, cognitive decline, psychiatric symptoms, tremors, ataxia, chorea & dystonia/Leukodystrophy, cerebellar atrophy, cognitive decline, psychiatric symptoms, tremors, ataxia, chorea & dystonia
2	ABCA2	ATP binding cassette subfamily A member 2	HGNC:32	9q34.3				+	Cerebellar ataxia and dysarthria
3	ABCB7	ATP binding cassette subfamily B member 7	HGNC:48	Xq13.3				+	Anemia, sideroblastic, with ataxia/Cerebellar ataxia/Sideroblastic anaemia and ataxia
4	ABCD1	ATP binding cassette subfamily D member 1	HGNC:61	Xq28		+	Hereditary spastic paraplegia/Spastic paraplegia/Spastic Paraplegia	+	Spastic ataxia/Spastic ataxia
5	ABHD12	abhydrolase domain containing 12, lysophospholipase	HGNC:15868	20p11.21				+	Ataxia/Cerebellar ataxia/Polyneuropathy, hearing loss, ataxia, retinitis pigmentosa & cataract/Polyneuropathy, hearing loss, ataxia, retinitis pigmentosa & early onset cataract/Polyneuropathy, hearing loss, ataxia, retinitis pigmentosa, and cataract
6	ACBD5	acyl-CoA binding domain containing 5	HGNC:23338	10p12.1				+	Leukodystrophy, cleft palate, ataxia and retinal dystrophy
7	ACO2	aconitase 2	HGNC:118	22q13.2		+	Severe optic atrophy & spastic paraplegia/Spastic paraplegia, complicated	+	Eye abnormalities, ataxia, hypotonia, seizures & developmental delay/Hypotonia, ataxia, eye abnormalities & developmental delay/Seizures, ataxia, hypotonia, optic atrophy, developmental delay & microcephaly/Truncal ataxia, hypotonia, developmental delay & hearing loss
8	ACOX2	acyl-CoA oxidase 2	HGNC:120	3p14.3				+	Elevated transaminase levels, liver fibrosis, mild ataxia, and cognitive impairment
9	ADA2	adenosine deaminase 2	HGNC:1839	22q11.1		+	Spastic paraplegia & systemic vasculitis
10	ADAR	adenosine deaminase RNA specific	HGNC:225	1q21.3		+	Spastic paraplegia	+	Ataxia
11	ADK	adenosine kinase	HGNC:257	10q22.2				+	Ataxia/Dystonia/Spasticity/Myotonia
12	ADPRS	ADP-ribosylserine hydrolase	HGNC:21304	1p34.3				+	Epilepsy-ataxia syndrome/Neurodegeneration with developmental delay, ataxia and axonal neuropathy/Stress-induced childhood-onset neurodegeneration with variable ataxia & seizures
13	AFF2	AF4/FMR2 family member 2	HGNC:3776	Xq28				+	Intellectual disability, ataxia & bilateral inguinal hernia
14	AFG3L2	AFG3 like matrix AAA peptidase subunit 2	HGNC:315	18p11.21	+	+	Spastic paraplegia	+	Ataxia/Cerebellar ataxia/Cerebellar ataxia (metabolic presentation)/Cerebellar ataxia with muscle fibre atrophy/Cerebellar ataxia, late-onset, with pyramidal signs/Spastic ataxia/Spastic ataxia/Spastic ataxia & eye-of-the-tiger-like sign/Spastic ataxia (cellebellar and pyramidal signs)/Spastic ataxia 5, autosomal recessive| Spinocerebellar ataxia 28/Spastic ataxia, type 5/Spastic ataxia-neuropath…
15	AGTR1	angiotensin II receptor type 1	HGNC:336	3q24				+	Friedreich ataxia, modifier of
16	AIFM1	apoptosis inducing factor mitochondria associated 1	HGNC:8768	Xq26.1				+	Cerebellar ataxia/Cerebellar ataxia, neuropathy, hearing loss and intellectual disability
17	ALDH18A1	aldehyde dehydrogenase 18 family member A1	HGNC:9722	10q24.1		+	Spastic paraplegia/Spastic paraplegia, autosomal dominant/Spastic paraplegia, autosomal recessive	+	Ataxia
18	ALDH5A1	aldehyde dehydrogenase 5 family member A1	HGNC:408	6p22.3				+	Ataxia
19	ALS2	alsin Rho guanine nucleotide exchange factor ALS2	HGNC:443	2q33.1		+	Spastic paraplegia/Spastic paraplegia, infantile ascending/Spastic paraplegia, infantile-onset	+	Spastic ataxia (cellebellar and pyramidal signs)
20	AMACR	alpha-methylacyl-CoA racemase	HGNC:451	5p13.2				+	Cerebellar ataxia/Cerebellar ataxia, late-onset autosomal recessive
21	AMPD2	adenosine monophosphate deaminase 2	HGNC:469	1p13.3		+	Spastic paraplegia 63
22	ANG	angiogenin	HGNC:483	14q11.2		+	Spastic paraplegia 5
23	ANO10	anoctamin 10	HGNC:25519	3p22.1-p21.33	+			+	Adult-onset cerebellar ataxia with coenzyme Q10 deficiency/Ataxia/Cerebellar ataxia 3/Cerebellar ataxia with oculomotor apraxia-like phenotype/Cerebellar ataxia, adult-onset with coenzyme Q10 deficiency/Progressive cerebellar ataxia/Spastic ataxia (cellebellar and pyramidal signs)/Spinocerebellar ataxia/Spinocerebellar ataxia, autosomal recessive/Spinocerebellar ataxia, autosomal recessive 10/Spi…
24	AP4B1	adaptor related protein complex 4 subunit beta 1	HGNC:572	1p13.2		+	Intellectual disability, spastic paraplegia & short stature/Spastic paraplegia/Spastic paraplegia type 47/Spastic paraplegia, autosomal recessive/Spastic paraplegia, childhood-onset/Spastic paraplegia, type 47
25	AP4E1	adaptor related protein complex 4 subunit epsilon 1	HGNC:573	15q21.2		+	Intellectual disability, spastic paraplegia & short stature/Spastic paraplegia/Spastic paraplegia 51/Spastic paraplegia, childhood-onset
26	AP4M1	adaptor related protein complex 4 subunit mu 1	HGNC:574	7q22.1		+	Spastic paraplegia/Spastic paraplegia, autosomal recessive/Spastic paraplegia, childhood-onset/Spastic paraplegia, type 50	+	Cerebellar ataxia
27	AP4S1	adaptor related protein complex 4 subunit sigma 1	HGNC:575	14q12		+	Hereditary spastic paraplegia/Intellectual disability, spastic paraplegia & short stature/Seizures, fever-sensitive, developmental delay & spastic paraplegia/Spastic paraplegia/Spastic paraplegia, autosomal recessive/Spastic paraplegia, childhood-onset
28	AP5Z1	adaptor related protein complex 5 subunit zeta 1	HGNC:22197	7p22.1		+	Spastic paraplegia/Spastic paraplegia 48/Spastic paraplegia 48, autosomal recessive/Spastic paraplegia, complex
29	APOB	apolipoprotein B	HGNC:603	2p24.1				+	Progressive cerebellar ataxia
30	APTX	aprataxin	HGNC:15984	9p21.1				+	Ataxia/Ataxia with oculomotor apraxia, type 1/Ataxia, childhood-onset/Ataxia, early-onset, with ocular motor apraxia & hypoalbuminaemia/Ataxia, early-onset, with oculomotor apraxia and hypoalbuminemia/Ataxia-ocular apraxia/Ataxia-ocular apraxia 1/Cerebellar ataxia/Cerebellar ataxia with oculomotor apraxia-like phenotype/Cerebellar ataxia, autosomal recessive/Charcot-Marie-Tooth-like neuropathy an…
31	ARG1	arginase 1	HGNC:663	6q23.2		+	Spastic paraplegia
32	ARL6IP1	ADP ribosylation factor like GTPase 6 interacting protein 1	HGNC:697	16p12.3		+	Hereditary spastic paraplegia, complicated, fatal/Spastic paraplegia 61	+	Cerebellar ataxia
33	ARSA	arylsulfatase A	HGNC:713	22q13.33				+	Episodic ataxia
34	ARSI	arylsulfatase family member I	HGNC:32521	5q32		+	Spastic paraplegia 66
35	ASB3	ankyrin repeat and SOCS box containing 3	HGNC:16013	2p16.2				+	Ataxia, dystonia, hypertonia
36	ATAD3A	ATPase family AAA domain containing 3A	HGNC:25567	1p36.33		+	Spastic paraplegia, autosomal dominant	+	Late-onset encephalopathy with cerebellar atrophy, ataxia and dystonia
37	ATAD3B	ATPase family AAA domain containing 3B	HGNC:24007	1p36.33				+	Late-onset encephalopathy with cerebellar atrophy, ataxia and dystonia
38	ATCAY	ATCAY kinesin light chain interacting caytaxin	HGNC:779	19p13.3				+	Ataxia, cerebellar, Cayman type/Ataxia, gait/Cerebellar ataxia, Cayman type
39	ATG5	autophagy related 5	HGNC:589	6q21	+			+	?Spinocerebellar ataxia, autosomal recessive 25/Ataxia, mental retardation and developmental delay
40	ATL1	atlastin GTPase 1	HGNC:11231	14q22.1		+	Complicated hereditary spastic paraplegia/Spastic paraplegia/Spastic paraplegia 3/Spastic paraplegia 3A/Spastic paraplegia 3A, neonatal onset/Spastic paraplegia with thin corpus callosum/Spastic paraplegia, autosomal dominant/Spastic paraplegia, silver syndrome type	+	Ataxia/Dystonia/Spasticity/Myotonia
41	ATL3	atlastin GTPase 3	HGNC:24526	11q13.1		+	Spastic paraplegia
42	ATM	ATM serine/threonine kinase	HGNC:795	11q22.3				+	Ataxia/Ataxia and moderate dyskinesia/Ataxia telangiectasia/Ataxia telangiectasia, atypical/Ataxia telangiectasia, atypical with T-cell acute lymphoblastic leukaemia/Ataxia telangiectasia, late-onset variant/Ataxia telangiectasia, mild/Ataxia telangiectasia, variant/Ataxia, childhood-onset/Ataxia-telangiectasia, cutaneous granulomas & hyper-IgM/Ataxia-telangiectasia| {Breast cancer, susceptibilit…
43	ATP13A2	ATPase cation transporting 13A2	HGNC:30213	1p36.13		+	Spastic paraplegia/Spastic paraplegia and parkinsonism	+	Ataxia with spasticity/Ataxia, seizures, spasticity/Ataxia-myoclonus syndrome
44	ATP1A1	ATPase Na+/K+ transporting subunit alpha 1	HGNC:799	1p13.1		+	Spastic paraplegia
45	ATP1A2	ATPase Na+/K+ transporting subunit alpha 2	HGNC:800	1q23.2				+	Episodic ataxia
46	ATP1A3	ATPase Na+/K+ transporting subunit alpha 3	HGNC:801	19q13.2				+	Ataxia/Ataxia, childhood-onset/Ataxia, rapid-onset/CAOS-episodic cerebellar ataxia, areflexia, optic atrophy, and sensorineural hearing loss/Cerebellar ataxia/Childhood rapid-onset ataxia/Chronic ataxia with developmental delay/Episodic ataxia/Failure to thrive, growth retardation, physical and speech delay, squint, nystagmus, ataxia and hypotonia/Relapsing encephalopathy with cerebellar ataxia
47	ATP2B2	ATPase plasma membrane Ca2+ transporting 2	HGNC:815	3p25.3				+	Cerebellar ataxia
48	ATP2B3	ATPase plasma membrane Ca2+ transporting 3	HGNC:816	Xq28	+			+	?Spinocerebellar ataxia, X-linked 1/Cerebellar ataxia/Cerebellar ataxia, X-linked/Spinocerebellar ataxia, X-linked 1
49	ATP2B4	ATPase plasma membrane Ca2+ transporting 4	HGNC:817	1q32.1		+	Spastic paraplegia
50	ATP7B	ATPase copper transporting beta	HGNC:870	13q14.3				+	Ataxia/Cerebellar ataxia (metabolic presentation)/Cerebellar ataxia (metabolic presentation)/Cerebellar ataxia with other neurological features
51	ATP8A2	ATPase phospholipid transporting 8A2	HGNC:13533	13q12.13				+	?Cerebellar ataxia, mental retardation, and dysequilibrium syndrome 4/Cerebellar ataxia, mental retardation and dysequilibrium syndrome, type 4
52	ATRX	ATRX chromatin remodeler	HGNC:886	Xq21.1		+	Mental retardation and spastic paraplegia
53	ATXN1	ataxin 1	HGNC:10548	6p22.3	+			+	Maculopathy with spinocerebellar ataxia type 1/Spinocerebellar ataxia 1/Spinocerebellar ataxia 1
54	ATXN10	ataxin 10	HGNC:10549	22q13.31	+			+	Spinocerebellar ataxia 10/Spinocerebellar ataxia 10
55	ATXN1L	ataxin 1 like	HGNC:33279	16q22.2				+	Ataxia
56	ATXN2	ataxin 2	HGNC:10555	12q24.12	+			+	{Amyotrophic lateral sclerosis, susceptibility to, 13}| {Parkinson disease, late-onset, susceptibility to}| Spinocerebellar ataxia 2/Ataxia/Cerebellar ataxia/Spinocerebellar ataxia 2/Spinocerebellar ataxia 2, infantile-onset/Spinocerebellar ataxia 2, neonatal-onset/Spinocerebellar ataxia 2, parkinsonism phenotype/Spinocerebellar ataxia 2, pure ataxia phenotype
57	ATXN3	ataxin 3	HGNC:7106	14q32.12	+			+	Ataxia/Cerebellar ataxia with sensory neuropathy/Spinocerebellar ataxia/Spinocerebellar ataxia 3
58	ATXN7	ataxin 7	HGNC:10560	3p14.1	+			+	Spinocerebellar ataxia 7/Spinocerebellar ataxia 7
59	ATXN8	ataxin 8	HGNC:32925	13q21.33	+			+	Spinocerebellar ataxia 8/Spinocerebellar ataxia 8
60	ATXN8OS	ATXN8 opposite strand lncRNA	HGNC:10561	13q21.33	+			+	{Parkinson disease, susceptibility to}| Spinocerebellar ataxia 8/Ataxia/Spinocerebellar ataxia 8
61	B4GALNT1	beta-1,4-N-acetyl-galactosaminyltransferase 1	HGNC:4117	12q13.3		+	Spastic paraplegia/Spastic paraplegia 26	+	Cerebellar ataxia
62	BCAP31	B cell receptor associated protein 31	HGNC:16695	Xq28				+	Intellectual disability, bilateral deafness, spastic ataxia & cryptorchidism
63	BCS1L	BCS1 homolog, ubiquinol-cytochrome c reductase complex chaperone	HGNC:1020	2q35				+	Ataxia, childhood-onset
64	BEAN1	brain expressed associated with NEDD4 1	HGNC:24160	16q21	+			+	Spinocerebellar ataxia 31/Spinocerebellar ataxia 31
65	BICD2	BICD cargo adaptor 2	HGNC:17208	9q22.31		+	Spastic paraplegia	+	Ataxia
66	BRAT1	BRCA1 associated ATM activator 1	HGNC:21701	7p22.3				+	Cerebellar ataxia/intellectual disability, ataxia & cerebellar atrophy
67	BSCL2	BSCL2 lipid droplet biogenesis associated, seipin	HGNC:15832	11q12.3		+	Complicated hereditary spastic paraplegia/Hereditary motor and sensory neuropathy type 2/Spastic paraplegia/Spastic paraplegia 17	+	Spastic ataxia (cellebellar and pyramidal signs)
68	C19orf12	chromosome 19 open reading frame 12	HGNC:25443	19q12		+	Spastic paraplegia/Spastic paraplegia 43	+	Cerebellar ataxia
69	CA8	carbonic anhydrase 8	HGNC:1382	8q12.1		+	Spastic paraplegia	+	Ataxia, cerebellar hypoplasia/Cerebellar ataxia and mental retardation with or without quadrupedal locomotion 3/Cerebellar ataxia and quadrupedal locomotion/Cerebellar ataxia, mental retardation & dysequilibrium syndrome 3
70	CACNA1A	calcium voltage-gated channel subunit alpha1 A	HGNC:1388	19p13.13	+			+	Absence epilepsy with ataxia/Ataxia/Ataxia with episodic tremor/Ataxia, adult-onset/Ataxia, childhood-onset/Ataxia, mental retardation and dyskinesia/Ataxia, nonprogressive congenital/Ataxia, non-progressive congenital/Calcium-channelopathy associated with ataxia/Cerebellar ataxia/Cerebellar ataxia (metabolic presentation)/Cerebellar ataxia and attention-deficit-hyperactivity disorder/Cerebellar …
71	CACNA1C	calcium voltage-gated channel subunit alpha1 C	HGNC:1390	12p13.33				+	Cerebellar ataxia
72	CACNA1E	calcium voltage-gated channel subunit alpha1 E	HGNC:1392	1q25.3				+	Episodic ataxia
73	CACNA1G	calcium voltage-gated channel subunit alpha1 G	HGNC:1394	17q21.33	+			+	Ataxia/Cerebellar ataxia, autosomal dominant/Cerebellar ataxia, syndromic, infantile-onset/Spinocerebellar ataxia/Spinocerebellar ataxia 42| Spinocerebellar ataxia 42, early-onset, severe, with neurodevelopmental deficits
74	CACNA2D2	calcium voltage-gated channel auxiliary subunit alpha2delta 2	HGNC:1400	3p21.31				+	Cerebellar ataxia
75	CACNB4	calcium voltage-gated channel auxiliary subunit beta 4	HGNC:1404	2q23.3				+	{Epilepsy, idiopathic generalized, susceptibility to, 9}| {Epilepsy, juvenile myoclonic, susceptibility to, 6}| Episodic ataxia, type 5
76	CAMTA1	calmodulin binding transcription activator 1	HGNC:18806	1p36.31-p36.23				+	Ataxia, non-progressive congenital/Cerebellar ataxia, nonprogressive, with mental retardation/Cerebellar ataxia, nonprogressive, with mental retardation/Spastic ataxia syndrome
77	CAPN1	calpain 1	HGNC:1476	11q13.1	+	+	Hereditary spastic paraplegia / spinocerebellar ataxia/Pure spastic paraplegia, congenital-onset/Spastic paraplegia/Spastic Paraplegia/Spastic paraplegia 76/Spastic paraplegia, autosomal recessive	+	Cerebellar ataxia/Cerebellar ataxia & limb spasticity/Hereditary spastic paraplegia / spinocerebellar ataxia/Spastic ataxia/Spastic ataxia/Spastic paraparesis and ataxia
78	CASK	calcium/calmodulin dependent serine protein kinase	HGNC:1497	Xp11.4				+	Ataxia, childhood-onset
79	CCDC82	coiled-coil domain containing 82	HGNC:26282	11q21				+	Brain atrophy, white matter disease & ataxia
80	CCDC88C	coiled-coil domain containing 88C	HGNC:19967	14q32.11-q32.12	+			+	Ataxia, tremor and dementia/Hydrocephalus, congenital, 1| ?Spinocerebellar ataxia 40/Spinocerebellar ataxia
81	CCT5	chaperonin containing TCP1 subunit 5	HGNC:1618	5p15.2		+	Mutilating sensory neuropathy with spastic paraplegia
82	CD40LG	CD40 ligand	HGNC:11935	Xq26.3				+	Ataxia telangiectasia-like syndrome
83	CEP290	centrosomal protein 290	HGNC:29021	12q21.32				+	Cerebellar ataxia (metabolic presentation)/Episodic ataxia
84	CHP1	calcineurin like EF-hand protein 1	HGNC:17433	15q15.1				+	Ataxia/Cerebellar ataxia
85	CHRNA7	cholinergic receptor nicotinic alpha 7 subunit	HGNC:1960	15q13.3				+	Developmental delay, absent speech, therapy-refractory seizures, ataxia, muscular hypotonia and facial dysmorphism
86	CLCN1	chloride voltage-gated channel 1	HGNC:2019	7q34				+	Ataxia/Episodic ataxia
87	CLCN2	chloride voltage-gated channel 2	HGNC:2020	3q27.1				+	{Epilepsy, idiopathic generalized, susceptibility to, 11}| {Epilepsy, juvenile absence, susceptibility to, 2}| {Epilepsy, juvenile myoclonic, susceptibility to, 8}| Hyperaldosteronism, familial, type II| Leukoencephalopathy with ataxia/Ataxia/Leukoencephalopathy with ataxia
88	CLK2	CDC like kinase 2	HGNC:2069	1q22				+	Mental retardation, ataxia & atrophy of the brain
89	CLN5	CLN5 intracellular trafficking protein	HGNC:2076	13q22.3				+	Ataxia, adult-onset/Ataxia, childhood-onset/Cerebellar ataxia/Cerebellar ataxia (metabolic presentation)/Spastic ataxia (cellebellar and pyramidal signs)
90	CLN6	CLN6 transmembrane ER protein	HGNC:2077	15q23				+	Cerebellar ataxia/Cerebellar ataxia with other neurological features/Cerebellar ataxia, juvenile onset with seizures/Developmental delay, cerebellar atrophy, ataxia and cryptorchidism
91	CLN8	CLN8 transmembrane ER and ERGIC protein	HGNC:2079	8p23.3		+	Spastic paraplegia	+	Cerebellar ataxia
92	CNTF	ciliary neurotrophic factor	HGNC:2169	11q12.1				+	Motor and speech delay, Intellectual disability, Learning disability, Developmental regression, Ataxia, Muscle weakness
93	CNTN4	contactin 4	HGNC:2174	3p26.3-p26.2	+			+	Spinocerebellar ataxia 16
94	CNTN5	contactin 5	HGNC:2175	11q22.1				+	Overgrowth, Macrocephaly, Speech delay, Learning disability, Developmental regression, Ataxia, Seizures, Periventricular leuk
95	CNTNAP2	contactin associated protein 2	HGNC:13830	7q35-q36.1				+	Intellectual disability and ataxia
96	COA7	cytochrome c oxidase assembly factor 7	HGNC:25716	1p32.3	+			+	Spinocerebellar ataxia & axonal neuropathy
97	COG5	component of oligomeric golgi complex 5	HGNC:14857	7q22.3				+	Friedreich ataxia-like phenotype with isolated cerebellar atrophy
98	COQ2	coenzyme Q2, polyprenyltransferase	HGNC:25223	4q21.23				+	Ataxia/Cerebellar ataxia/Multiple system atrophy, olivopontocerebellar ataxia type, increased risk
99	COQ4	coenzyme Q4	HGNC:19693	9q34.11	+			+	Ataxia, childhood-onset/Spinocerebellar ataxia, childhood-onset and stroke-like episodes
100	COQ5	coenzyme Q5, methyltransferase	HGNC:28722	12q24.31				+	Cerebellar ataxia and static encephalomyopathy
101	COQ8A	coenzyme Q8A	HGNC:16812	1q42.13	+			+	Ataxia/Ataxia, childhood-onset/Ataxia, nystagmus, slurred speech, dysmetria, dysdiadochokinesia, slightly reduced reflexes, and cerebellar atrophy/Cerebellar ataxia/Cerebellar ataxia/Cerebellar ataxia & muscle CoQ10 deficiency/Cerebellar ataxia (metabolic presentation)/Cerebellar ataxia 2/Cerebellar ataxia and myoclonus/Cerebellar ataxia with oculomotor apraxia-like phenotype/Cerebellar ataxia, a…
102	COX20	cytochrome c oxidase assembly factor COX20	HGNC:26970	1q44				+	Ataxia and muscle hypotonia/Dysarthria, ataxia and sensory neuropathy/Dystonia-ataxia syndrome with reduced mitochondrial complex IV activity
103	CP	ceruloplasmin	HGNC:2295	3q24-q25.1				+	Cerebellar ataxia| Hemosiderosis, systemic, due to aceruloplasminemia| [Hypoceruloplasminemia, hereditary]
104	CPT1C	carnitine palmitoyltransferase 1C	HGNC:18540	19q13.33		+	Spastic paraplegia/Spastic paraplegia, autosomal dominant
105	CSF1R	colony stimulating factor 1 receptor	HGNC:2433	5q32				+	Ataxia & muscle weakness
106	CSTB	cystatin B	HGNC:2482	21q22.3				+	Cerebellar ataxia
107	CTBP1	C-terminal binding protein 1	HGNC:2494	4p16.3				+	Developmental delay, hypotonia, ataxia and tooth enamel defects/Hypotonia, ataxia, developmental delay, and tooth enamel defect syndrome
108	CTNNB1	catenin beta 1	HGNC:2514	3p22.1				+	Aggressive behaviour, ataxia, hypermetropia, microcephaly, and specific learning disability/Cerebral white matter abnormality, ichthyosiform erythroderma, gait ataxia, global developmental delay, and microcephaly/Cognitive impairment, abnormal hair pattern, gait ataxia, obesity, and postnatal microcephaly
109	CTSF	cathepsin F	HGNC:2531	11q13.2				+	Ataxia
110	CWF19L1	CWF19 like cell cycle control factor 1	HGNC:25613	10q24.31	+			+	Ataxia/Cerebellar ataxia 17/Cerebellar ataxia, autosomal recessive and atrophy/Spinocerebellar ataxia/Spinocerebellar ataxia, autosomal recessive 17
111	CYP27A1	cytochrome P450 family 27 subfamily A member 1	HGNC:2605	2q35		+	Hereditary spastic paraplegia	+	Cerebellar ataxia/Mental retardation and ataxia
112	CYP2U1	cytochrome P450 family 2 subfamily U member 1	HGNC:20582	4q25		+	Spastic paraplegia/Spastic paraplegia with activity induced dystonia & motor regression/Spastic paraplegia with pigmentary degenerative maculopathy
113	CYP7B1	cytochrome P450 family 7 subfamily B member 1	HGNC:2652	8q12.3	+	+	Spastic paraplegia/Spastic paraplegia 5/Spastic paraplegia 5 with sensory ataxia/Spastic paraplegia 5a	+	Spastic ataxia (cellebellar and pyramidal signs)/Spastic paraplegia 5 with sensory ataxia/Spinocerebellar ataxia 19
114	DAB1	DAB adaptor protein 1	HGNC:2661	1p32.2	+			+	Spinocerebellar ataxia 37/Spinocerebellar ataxia 37
115	DARS2	aspartyl-tRNA synthetase 2, mitochondrial	HGNC:25538	1q25.1				+	Episodic ataxia, exercise-induced
116	DCC	DCC netrin 1 receptor	HGNC:2701	18q21.2				+	Ataxia, adult-onset
117	DDHD1	DDHD domain containing 1	HGNC:19714	14q22.1		+	Spastic paraplegia/Spastic paraplegia with retinal dystrophy and neurodegeneration/Spastic paraplegia, autosomal recessive
118	DDHD2	DDHD domain containing 2	HGNC:29106	8p11.23		+	Hereditary spastic paraplegia with intellectual disability/Spastic paraplegia/Spastic paraplegia, autosomal recessive
119	DEGS1	delta 4-desaturase, sphingolipid 1	HGNC:13709	1q42.11		+	Intellectual disability, spastic paraplegia and epilepsy
120	DLG3	discs large MAGUK scaffold protein 3	HGNC:2902	Xq13.1				+	Moderate intellectual disability with facial dysmorphism, ataxia, hypotonia, microcephaly and seizures
121	DLGAP4	DLG associated protein 4	HGNC:24476	20q11.23				+	Cerebellar ataxia, early-onset
122	DNA2	DNA replication helicase/nuclease 2	HGNC:2939	10q21.3				+	Cerebellar ataxia, myoclonic epilepsy, cataract, deafness and hyperlactatemia
123	DNAJC19	DnaJ heat shock protein family (Hsp40) member C19	HGNC:30528	3q26.33				+	Dilated cardiomyopathy with ataxia syndrome
124	DNAJC3	DnaJ heat shock protein family (Hsp40) member C3	HGNC:9439	13q32.1				+	?Ataxia, combined cerebellar and peripheral, with hearing loss and diabetes mellitus/Progressive ataxia, developmental delay & facial dysmorphism
125	DNM2	dynamin 2	HGNC:2974	19p13.2		+	Spastic paraplegia, adult-onset, autosomal dominant	+	Ataxia, hypotonia, speech delay, developmental regression
126	DNMT1	DNA methyltransferase 1	HGNC:2976	19p13.2		+	Spastic paraplegia	+	Ataxia, seizures, & late-onset dementia/Cerebellar ataxia/Cerebellar ataxia, deafness & narcolepsy/Cerebellar ataxia, deafness & narcolepsy/Sensory neuropathy with dementia & hearing loss/Cerebellar ataxia, deafness, and narcolepsy, autosomal dominant| Neuropathy, hereditary sensory, type IE/Polyneuropathy and ataxia
127	DOCK3	dedicator of cytokinesis 3	HGNC:2989	3p21.2				+	Muscle hypotonia, ataxia & intellectual disability/Neurodevelopmental disorder with impaired intellectual development, hypotonia, and ataxia
128	DOCK6	dedicator of cytokinesis 6	HGNC:19189	19p13.2				+	Ataxia
129	DYNC1H1	dynein cytoplasmic 1 heavy chain 1	HGNC:2961	14q32.31		+	Spastic paraplegia, complicated
130	DYSF	dysferlin	HGNC:3097	2p13.2				+	Cerebellar ataxia
131	EBF3	EBF transcription factor 3	HGNC:19087	10q26.3				+	Ataxia, childhood-onset/Hypotonia, ataxia and developmental delay syndrome/Hypotonia, ataxia, and delayed development syndrome/Moderate intellectual disability,speech delay,hypotonia & ataxia
132	ECHS1	enoyl-CoA hydratase, short chain 1	HGNC:3151	10q26.3				+	Dystonia-ataxia syndrome with permanent torsional nystagmus
133	EEF2	eukaryotic translation elongation factor 2	HGNC:3214	19p13.3	+			+	?Spinocerebellar ataxia 26/Spastic ataxia (cellebellar and pyramidal signs)/Spinocerebellar ataxia 26
134	EIF2B3	eukaryotic translation initiation factor 2B subunit gamma	HGNC:3259	1p34.1				+	Childhood ataxia with central nervous system hypomyelination
135	EIF2B5	eukaryotic translation initiation factor 2B subunit epsilon	HGNC:3261	3q27.1		+	Spastic paraplegia
136	EIF4G1	eukaryotic translation initiation factor 4 gamma 1	HGNC:3296	3q27.1				+	Ataxia
137	ELF2	E74 like ETS transcription factor 2	HGNC:3317	4q31.1				+	Cerebellar ataxia with neuropathy and bilateral vestibular areflexia syndrome
138	ELOVL4	ELOVL fatty acid elongase 4	HGNC:14415	6q14.1	+			+	Cerebellar ataxia/Cerebellar ataxia, late-onset/Ichthyosis, spastic quadriplegia, and mental retardation| Spinocerebellar ataxia 34| Stargardt disease 3/Spinocerebellar ataxia/Spinocerebellar ataxia & erythrokeratodermia/Spinocerebellar ataxia 34
139	ELOVL5	ELOVL fatty acid elongase 5	HGNC:21308	6p12.1	+			+	Ataxia/Cerebellar ataxia, late-onset, with pyramidal signs/Spinocerebellar ataxia 38/Spinocerebellar ataxia 38
140	EMC1	ER membrane protein complex subunit 1	HGNC:28957	1p36.13		+	Cerebellar atrophy
141	ENTPD1	ectonucleoside triphosphate diphosphohydrolase 1	HGNC:3363	10q24.1		+	Spastic paraplegia/Spastic paraplegia 64
142	EP300	E1A binding protein p300	HGNC:3373	22q13.2	+			+	Spinocerebellar ataxia
143	EPB41L4A	erythrocyte membrane protein band 4.1 like 4A	HGNC:13278	5q22.1-q22.2		+	Spastic paraplegia, failure to thrive
144	ERCC4	ERCC excision repair 4, endonuclease catalytic subunit	HGNC:3436	16p13.12				+	Ataxia/Cerebellar ataxia
145	ERCC5	ERCC excision repair 5, endonuclease	HGNC:3437	13q33.1				+	Spastic ataxia (cellebellar and pyramidal signs)
146	ERCC6	ERCC excision repair 6, chromatin remodeling factor	HGNC:3438	10q11.23				+	Cerebellar ataxia/Hearing loss, loss of ambulation, hypotonia, cerebellar ataxia and sensory neuropathy
147	ERCC8	ERCC excision repair 8, CSA ubiquitin ligase complex subunit	HGNC:3439	5q12.1				+	Cerebellar ataxia, cutaneous photosensitivity and mild intellectual disability
148	ERLIN1	ER lipid raft associated 1	HGNC:16947	10q24.31		+	Spastic paraplegia 62
149	ERLIN2	ER lipid raft associated 2	HGNC:1356	8p11.23		+	Hereditary spastic paraplegia/Spastic paraplegia/Spastic paraplegia 18/Spastic paraplegia 18, autosomal recessive
150	EXOSC3	exosome component 3	HGNC:17944	9p13.2		+	Spastic paraplegia	+	Ataxia
151	FA2H	fatty acid 2-hydroxylase	HGNC:21197	16q23.1		+	Spastic paraplegia/Spastic Paraplegia/Spastic paraplegia 35/Spastic paraplegia, autosomal recessive/Spastic paraplegia, complex/Spastic paraplegia, late-onset	+	Cerebellar ataxia, nystagmus, hyperreflexia, dysdiadochokinaesia, postural tremor, rigidity and dystonic posture
152	FAM222A	family with sequence similarity 222 member A	HGNC:25915	12q24.11				+	Intellectual disability, microcephaly, cerebellar atrophy and ataxia
153	FARS2	phenylalanyl-tRNA synthetase 2, mitochondrial	HGNC:21062	6p25.1		+	Spastic paraplegia/Spastic paraplegia 77/Spastic paraplegia with dysphonia/Spastic paraplegia, autosomal recessive	+	Cerebellar ataxia
154	FASTKD2	FAST kinase domains 2	HGNC:29160	2q33.3				+	Cerebellar ataxia
155	FAT1	FAT atypical cadherin 1	HGNC:3595	4q35.2	+			+	Spinocerebellar ataxia
156	FAT2	FAT atypical cadherin 2	HGNC:3596	5q33.1	+			+	Spinocerebellar ataxia/Spinocerebellar ataxia 45
157	FGF14	fibroblast growth factor 14	HGNC:3671	13q33.1	+			+	Cerebellar ataxia/Cerebral ataxia, autosomal dominant/Episodic ataxia, autosomal dominant/Spinocerebellar ataxia/Spinocerebellar ataxia 27/Spinocerebellar ataxia 27
158	FHIP2A	FHF complex subunit HOOK interacting protein 2A	HGNC:29320	10q25.3				+	Intellectual disability, microcephaly, ataxia and speech problems
159	FLNC	filamin C	HGNC:3756	7q32.1				+	Myofibrillar myopathy, sensory ataxia & pyramidal signs
160	FLRT1	fibronectin leucine rich transmembrane protein 1	HGNC:3760	11q13.1		+	Spastic paraplegia 68
161	FLVCR1	FLVCR heme transporter 1	HGNC:24682	1q32.3				+	Ataxia, posterior column, with retinitis pigmentosa/Hereditary sensory-autonomic neuropathy, posterior column ataxia with retinitis pigmentosa, & leukaemia/Posterior column ataxia & retinitis pigmentosa/Retinitis pigmentosa without posterior column ataxia
162	FMR1	FMRP translational regulator 1	HGNC:3775	Xq27.3				+	Fragile X syndrome| Fragile X tremor/ataxia syndrome| Premature ovarian failure 1/Fragile X tremor ataxia syndrome/Fragile X-associated tremor ataxia syndrome/Fragile X-premutation tremor/ataxia syndrome/Multiple sclerosis (MS) and fragile X-associated tremor/ataxia syndrome/Multiple sclerosis/Fragile X-associated tremor/ataxia syndrome
163	FOXP1	forkhead box P1	HGNC:3823	3p13				+	Developmental delay, ataxia, distal arthrogryposis, atrial septal defect, dysmorphic features, & genitourinary abnormalities
164	FOXRED1	FAD dependent oxidoreductase domain containing 1	HGNC:26927	11q24.2				+	Ataxia
165	FRMD4A	FERM domain containing 4A	HGNC:25491	10p13				+	?Corpus callosum, agenesis of, with facial anomalies and cerebellar ataxia
166	FUS	FUS RNA binding protein	HGNC:4010	16p11.2				+	Ataxia
167	FXN	frataxin	HGNC:3951	9q21.11		+	Spastic paraplegia	+	Friedreich ataxia/Friedreich ataxia, early-onset/Friedreich ataxia| Friedreich ataxia with retained reflexes
168	GAD1	glutamate decarboxylase 1	HGNC:4092	2q31.1				+	Intellectual disability, epilepsy and ataxia
169	GALC	galactosylceramidase	HGNC:4115	14q31.3				+	Episodic ataxia
170	GARS1	glycyl-tRNA synthetase 1	HGNC:4162	7p14.3		+	Compl hereditary spastic paraplegia/Distal hereditary motor neuropathy/Hereditary sensory & autonomic neuropathy type 2
171	GBA2	glucosylceramidase beta 2	HGNC:18986	9p13.3		+	Spastic paraplegia/Spastic paraplegia 46/Spastic paraplegia, autosomal recessive/Spastic paraplegia, complicated	+	Cerebellar ataxia/Cerebellar ataxia with spasticity/Spastic ataxia (cellebellar and pyramidal signs)
172	GBE1	1,4-alpha-glucan branching enzyme 1	HGNC:4180	3p12.2				+	Cerebellar ataxia
173	GCH1	GTP cyclohydrolase 1	HGNC:4193	14q22.2		+	Spastic paraplegia/Spastic paraplegia, progressive
174	GDAP2	ganglioside induced differentiation associated protein 2	HGNC:18010	1p12	+			+	Cerebellar ataxia, autosomal recessive/Spinocerebellar ataxia 27
175	GJA1	gap junction protein alpha 1	HGNC:4274	6q22.31		+	Oculodentodigital dysplasia with spastic paraplegia/Spastic paraplegia, Speech delay, Learning disability
176	GJB1	gap junction protein beta 1	HGNC:4283	Xq13.1	+			+	Spinocerebellar ataxia 1
177	GJC2	gap junction protein gamma 2	HGNC:17494	1q42.13		+	Spastic paraplegia	+	Late-onset ataxia, pyramidal disturbances and mild parkinsonism/Short stature, motor delay, ataxia/Spastic ataxia/Spastic ataxia
178	GLS	glutaminase	HGNC:4331	2q32.2				+	Autosomal recessive spastic ataxia and optic atrophy/Developmental delay and progressive ataxia
179	GOSR2	golgi SNAP receptor complex member 2	HGNC:4431	17q21.32				+	Ataxia/Progressive myoclonus epilepsy with early ataxia
180	GPAA1	glycosylphosphatidylinositol anchor attachment 1	HGNC:4446	8q24.3				+	Ataxia, childhood-onset/Ataxia, childhood-onset
181	GPR88	G protein-coupled receptor 88	HGNC:4539	1p21.2		+	Chorea, speech delay & learning difficulties
182	GPT2	glutamic--pyruvic transaminase 2	HGNC:18062	16q11.2		+	Microcephaly, intellectual disability, developmental delay & spastic paraplegia features
183	GRID2	glutamate ionotropic receptor delta type subunit 2	HGNC:4576	4q22.1-q22.2	+	+	Spastic paraplegia, complicated	+	Ataxia/Cerebellar ataxia/Cerebellar ataxia & tonic upgaze/Cerebellar ataxia and atrophy/Cerebellar ataxia, early-onset with retinal dystrophy/Early onset cerebellar ataxia, cerebellar atrophy, nystagmus with developmental delay/Spinocerebellar ataxia, autosomal recessive/Spinocerebellar ataxia, autosomal recessive 18/Spinocerebellar ataxia, type 18
184	GRIK2	glutamate ionotropic receptor kainate type subunit 2	HGNC:4580	6q16.3				+	Ataxia, motor and speech delay, and intellectual disability
185	GRIPAP1	GRIP1 associated protein 1	HGNC:18706	Xp11.23				+	Moderate intellectual disability, ataxia and tremor
186	GRM1	glutamate metabotropic receptor 1	HGNC:4593	6q24.3	+			+	Ataxia/Cerebellar ataxia/Cerebellar ataxia, autosomal recessive congenital/Cerebellar ataxia, autosomal recessive, juvenile-onset/Spinocerebellar ataxia/Spinocerebellar ataxia 44| Spinocerebellar ataxia, autosomal recessive 13/Spinocerebellar ataxia, adult-onset/Spinocerebellar ataxia, juvenile-onset & intellectual disability
187	GRN	granulin precursor	HGNC:4601	17q21.31		+	Spastic paraplegia, complicated
188	HACE1	HECT domain and ankyrin repeat containing E3 ubiquitin protein ligase 1	HGNC:21033	6q16.3		+	Spastic paraplegia & psychmotor retardation
189	HEPACAM	hepatic and glial cell adhesion molecule	HGNC:26361	11q24.2				+	Ataxia
190	HEXA	hexosaminidase subunit alpha	HGNC:4878	15q23				+	Ataxia/Cerebellar ataxia with oculomotor apraxia-like phenotype/Spastic ataxia (cellebellar and pyramidal signs)
191	HIBCH	3-hydroxyisobutyryl-CoA hydrolase	HGNC:4908	2q32.2				+	Ataxia, childhood-onset/Ataxia, non-progressive
192	HPDL	4-hydroxyphenylpyruvate dioxygenase like	HGNC:28242	1p34.1		+	Spastic paraplegia, adolescent-onset
193	HSD17B4	hydroxysteroid 17-beta dehydrogenase 4	HGNC:5213	5q23.1				+	Cerebellar ataxia (metabolic presentation)
194	HSPB1	heat shock protein family B (small) member 1	HGNC:5246	7q11.23		+	Hereditary spastic paraplegia
195	HSPD1	heat shock protein family D (Hsp60) member 1	HGNC:5261	2q33.1		+	Spastic paraplegia/Spastic paraplegia, modifier of
196	HTRA2	HtrA serine peptidase 2	HGNC:14348	2p13.1				+	Ataxia
197	IBA57	iron-sulfur cluster assembly factor IBA57	HGNC:27302	1q42.13		+	Spastic paraplegia
198	IFIH1	interferon induced with helicase C domain 1	HGNC:18873	2q24.2		+	Spastic paraplegia
199	IFRD1	interferon related developmental regulator 1	HGNC:5456	7q31.1	+			+	Sensorimotor neuropathy with ataxia/Spinocerebellar ataxia 18
200	IFT172	intraflagellar transport 172	HGNC:30391	2p23.3				+	Retinitis pigmentosa & ataxia
201	INPP5E	inositol polyphosphate-5-phosphatase E	HGNC:21474	9q34.3				+	Ataxia
202	ISCA2	iron-sulfur cluster assembly 2	HGNC:19857	14q24.3		+	Spastic paraplegia, non-progressive
203	ITPR1	inositol 1,4,5-trisphosphate receptor type 1	HGNC:6180	3p26.1	+	+	Spastic paraplegia	+	Ataxia/Ataxia, adult-onset/Ataxia, childhood-onset/Ataxia, early-onset/Ataxia, early-onset/Cerebellar ataxia/Cerebellar ataxia (metabolic presentation)/Cerebellar ataxia, infantile-onset/Cerebellar ataxia, late-onset, with pyramidal signs/Cerebellar ataxia, non-progressive autosomal dominant/Gillespie syndrome| Spinocerebellar ataxia 15| Spinocerebellar ataxia 29, congenital nonprogressive/Spasti…
204	KCNA1	potassium voltage-gated channel subfamily A member 1	HGNC:6218	12p13.32				+	Ataxia/Cerebellar ataxia/Episodic ataxia/Episodic ataxia/Episodic ataxia / myokymia/Episodic ataxia / myokymia syndrome type 1 without ataxia/Episodic ataxia 1/Episodic ataxia with cerebellar dysfunction & cognitive delay/Episodic ataxia/myokymia syndrome
205	KCNA2	potassium voltage-gated channel subfamily A member 2	HGNC:6220	1p13.3		+	Spastic paraplegia & ataxia	+	Ataxia/Ataxia & myoclonic epilepsy/Epilepsy, mild language retardation, strabismus, mild ataxia, joint hyperlaxity & generalised hyperreflexia/Epileptic encephalopathy, ataxia & tremor/Episodic ataxia & pharmacoresponsive epilepsy/Spastic paraplegia & ataxia
206	KCNB1	potassium voltage-gated channel subfamily B member 1	HGNC:6231	20q13.13				+	Seizures, global developmental delay, ataxia & dystonia
207	KCNB2	potassium voltage-gated channel subfamily B member 2	HGNC:6232	8q21.11				+	Cerebellar ataxia
208	KCNC1	potassium voltage-gated channel subfamily C member 1	HGNC:6233	11p15.1				+	Myoclonus epilepsy & ataxia
209	KCNC2	potassium voltage-gated channel subfamily C member 2	HGNC:6234	12q21.1				+	Neurodevelopmental delay and ataxia
210	KCNC3	potassium voltage-gated channel subfamily C member 3	HGNC:6235	19q13.33	+			+	Ataxia/Cerebellar ataxia/Cerebellar ataxia, late-onset, with pyramidal signs/Mesial temporal lobe epilepsy, in spinocerebellar ataxia type 13/Spastic ataxia (cellebellar and pyramidal signs)/Spinocerebellar ataxia 13/Spinocerebellar ataxia 13
211	KCNC4	potassium voltage-gated channel subfamily C member 4	HGNC:6236	1p13.3				+	Ataxia & dystonia
212	KCND3	potassium voltage-gated channel subfamily D member 3	HGNC:6239	1p13.2	+			+	Ataxia, early-onset/Ataxia, early-onset/Brugada syndrome 9| Spinocerebellar ataxia 19/Cerebellar ataxia/Developmental delay, epilepsy, ataxia & mitochondrial dysfunction/Early onset cerebellar ataxia, intellectual disability, oral apraxia and epilepsy/Episodic ataxia/Intellectual disability, cerebellar ataxia, myoclonus & dystonia/Spastic ataxia (cellebellar and pyramidal signs)/Spinocerebellar a…
213	KCNJ10	potassium inwardly rectifying channel subfamily J member 10	HGNC:6256	1q23.2				+	Cerebellar ataxia/Developmental delay, failure to thrive, ataxia, hypotonia and tonic-clonic seizures/Epilepsy, ataxia, sensorineural deafness and tubulopathy/Infantile focal seizures, ataxia, and early developmental delay
214	KCNMA1	potassium calcium-activated channel subfamily M alpha 1	HGNC:6284	10q22.3				+	Cerebellar ataxia
215	KCNN3	potassium calcium-activated channel subfamily N member 3	HGNC:6292	1q21.3				+	Ataxia, association with
216	KCTD7	potassium channel tetramerization domain containing 7	HGNC:21957	7q11.21				+	Opsoclonus myoclonus ataxia-like syndrome
217	KIDINS220	kinase D interacting substrate 220	HGNC:29508	2p25.1		+	Spastic paraplegia/Spastic paraplegia & obesity/Spastic paraplegia, intellectual disability, nystagmus and obesity/Spastic paraplegia, intellectual disability, nystagmus, and obesity
218	KIF1A	kinesin family member 1A	HGNC:888	2q37.3		+	Autism, hyperactivity, epilepsy, sensory disturbance and spastic paraplegia/Spastic paraplegia/Spastic Paraplegia/Spastic paraplegia 30/Spastic paraplegia 30 & spinocerebellar/Spastic paraplegia with progressive CNS involvement/Spastic paraplegia, autosomal dominant	+	Ataxia/Dystonia/Spasticity/Myotonia/Cerebellar ataxia
219	KIF1B	kinesin family member 1B	HGNC:16636	1p36.22				+	Failure to thrive, motor and speech delay, learning disability, autism, leukomalacia, ataxia, dystonia, contractures, spastic
220	KIF1C	kinesin family member 1C	HGNC:6317	17p13.2		+	Hereditary spastic paraplegia with cerebellar dysfunction/Spastic paraplegia/Spastic paraplegia 58/Spastic paraplegia, complicated	+	Ataxia/Cerebellar ataxia/Cerebellar ataxia, dystonic tremor & hypomyelinating leukoencephalopathy/Spastic ataxia (cellebellar and pyramidal signs)/Spastic ataxia 2, autosomal recessive/Spastic ataxia, autosomal recessive/Speech delay, ataxia
221	KIF26B	kinesin family member 26B	HGNC:25484	1q44	+			+	Spinocerebellar ataxia
222	KIF5A	kinesin family member 5A	HGNC:6323	12q13.3		+	Spastic paraplegia/Spastic paraplegia / ataxia / motor neuron disease/Spastic paraplegia & peripheral neuropathy/Spastic paraplegia 10/Spastic paraplegia and cerebellar ataxia/Spastic paraplegia and sensory loss/Spastic paraplegia/axonal neuropathy	+	Ataxia, muscle weakness/Spastic paraplegia / ataxia / motor neuron disease/Spastic paraplegia and cerebellar ataxia
223	KIF7	kinesin family member 7	HGNC:30497	15q26.1				+	Cerebellar ataxia
224	KLC2	kinesin light chain 2	HGNC:20716	11q13.2		+	Spastic paraplegia, optic atrophy, and neuropathy
225	KLC4	kinesin light chain 4	HGNC:21624	6p21.1		+	Spastic paraplegia
226	KLHL1	kelch like family member 1	HGNC:6352	13q21.33				+	Cerebellar ataxia
227	KY	kyphoscoliosis peptidase	HGNC:26576	3q22.2		+	Spastic paraplegia, progressive
228	L1CAM	L1 cell adhesion molecule	HGNC:6470	Xq28		+	Spastic paraplegia
229	LAMA1	laminin subunit alpha 1	HGNC:6481	18p11.31				+	Ataxia, childhood-onset/Cerebellar ataxia
230	LAMA2	laminin subunit alpha 2	HGNC:6482	6q22.33				+	Moderate intellectual disability with seizures, speech delay, ataxia and spastic diplegia
231	LMNB2	lamin B2	HGNC:6638	19p13.3				+	Progressive myoclonus epilepsy with early ataxia
232	LRRK2	leucine rich repeat kinase 2	HGNC:18618	12q12				+	Cerebellar ataxia
233	LRSAM1	leucine rich repeat and sterile alpha motif containing 1	HGNC:25135	9q33.3-q34.11				+	Cerebellar ataxia
234	LYST	lysosomal trafficking regulator	HGNC:1968	1q42.3				+	Cerebellar ataxia, late-onset, with pyramidal signs
235	MAG	myelin associated glycoprotein	HGNC:6783	19q13.1		+	Spastic paraplegia	+	Cerebellar ataxia with oculomotor apraxia
236	MAPT	microtubule associated protein tau	HGNC:6893	17q21.31				+	Ataxia with cognitive impairment
237	MARS1	methionyl-tRNA synthetase 1	HGNC:6898	12q13.3		+	Spastic paraplegia 70
238	MARS2	methionyl-tRNA synthetase 2, mitochondrial	HGNC:25133	2q33.1				+	?Combined oxidative phosphorylation deficiency 25| Spastic ataxia 3, autosomal recessive/Cerebellar ataxia/Spastic ataxia with leukoencephalopathy (ARSAL)
239	MBD5	methyl-CpG binding domain protein 5	HGNC:20444	2q23.2				+	Intellectual disability, microcephaly, behavioural troubles, epilepsy, ataxia
240	MCOLN1	mucolipin TRP cation channel 1	HGNC:13356	19p13.2				+	Cerebellar ataxia, hyperreflexia, external ophthalmoparesis, bilateral corneal clouding, and abnormal behaviour/Generalized dystonia, ataxia and bradykinesia
241	MECP2	methyl-CpG binding protein 2	HGNC:6990	Xq28				+	Ataxia/Developmental delay, ataxia, autism & fatigue/Developmental delay, hypotonia, autism, ataxia & seizures/Developmental delay, intellectual disability, infections, hypotonia, facial features, cerebellar ataxia, small feet/Gross motor delay, Fine motor delay, Intellectual disability/Mental retardation, Stereotypic behaviors, Speech delay, Ataxia/Intellectual disability, autism spectrum disord…
242	MED23	mediator complex subunit 23	HGNC:2372	6q23.2				+	Ataxia, childhood-onset
243	MED25	mediator complex subunit 25	HGNC:28845	19q13.33				+	Intellectual disability, microcephaly, seizures & spastic ataxia
244	MFN2	mitofusin 2	HGNC:16877	1p36.22		+	Spastic paraplegia
245	MFSD8	major facilitator superfamily domain containing 8	HGNC:28486	4q28.2				+	Ataxia
246	MGME1	mitochondrial genome maintenance exonuclease 1	HGNC:16205	20p11.23				+	Cerebellar ataxia, early onset
247	MLKL	mixed lineage kinase domain like pseudokinase	HGNC:26617	16q23.1				+	Paresis, ataxia and dysarthria
248	MLLT3	MLLT3 super elongation complex subunit	HGNC:7136	9p21.3				+	Neuromotor dev. delay, cerebellar ataxia, epilepsy
249	MMACHC	metabolism of cobalamin associated C	HGNC:24525	1p34.1				+	with hypergonadotropic hypogonadism, mental retardation, epilepsy, ataxia, and leukodystrophy
250	MME	membrane metalloendopeptidase	HGNC:7154	3q25.2	+			+	Charcot-Marie-Tooth disease, axonal, type 2T| ?Spinocerebellar ataxia 43/Sensory ataxia/Spinocerebellar ataxia with neuropathy, 43
251	MPP7	membrane palmitoylated protein 7	HGNC:26542	10p12.1				+	Ataxia
252	MRE11	MRE11 homolog, double strand break repair nuclease	HGNC:7230	11q21				+	Ataxia telangiectasia-like disease/Ataxia telangiectasia-like syndrome with hypergonadotropic hypogonadism & hypersegmented neutrophils/Ataxia with oculomotor apraxia/Ataxia-telangiectasia-like disorder 1/Cerebellar ataxia/Progressive myoclonic ataxia
253	MSTO1	misato mitochondrial distribution and morphology regulator 1	HGNC:29678	1q22				+	Cerebellar ataxia and myopathy/Mitochondrial dynamics impairment with myopathy and ataxia/Myopathy, mitochondrial, and ataxia
254	MTCL1	microtubule crosslinking factor 1	HGNC:29121	18p11.22				+	Slowly progressive cerebellar ataxia & mild intellectual disabilty
255	MTPAP	mitochondrial poly(A) polymerase	HGNC:25532	10p11.23				+	?Spastic ataxia 4, autosomal recessive/Spastic ataxia/Spastic ataxia
256	MTRFR	mitochondrial translation release factor in rescue	HGNC:26784	12q24.31		+	Spastic paraplegia/Spastic paraplegia with optic atrophy & neuropathy
257	MYH14	myosin heavy chain 14	HGNC:23212	19q13.33				+	Ataxia
258	NAA15	N-alpha-acetyltransferase 15, NatA auxiliary subunit	HGNC:30782	4q31.1				+	Autism, mild ataxia & atrial ectopic tachycardia
259	NALCN	sodium leak channel, non-selective	HGNC:19082	13q32.3-q33.1				+	Cerebellar ataxia, intellectual disability and arthrogryposis/Intellectual disability, ataxia and arthrogryposis
260	NARS2	asparaginyl-tRNA synthetase 2, mitochondrial	HGNC:26274	11q14.1		+	Spastic paraplegia
261	NAV1	neuron navigator 1	HGNC:15989	1q32.1				+	Ataxia, hypertonia, spasticity, muscle weakness
262	NDST1	N-deacetylase and N-sulfotransferase 1	HGNC:7680	5q33.1				+	Developmental delay, ataxia, cranial nerve palsies & severe respiratory problems
263	NDUFA10	NADH:ubiquinone oxidoreductase subunit A10	HGNC:7684	2q37.3				+	Ataxia, hypotonia, developmental regression
264	NDUFS7	NADH:ubiquinone oxidoreductase core subunit S7	HGNC:7714	19p13.3				+	Cerebellar ataxia
265	NEMF	nuclear export mediator factor	HGNC:10663	14q21.3		+	Axonal neuropathy and spastic paraplegia
266	NEU1	neuraminidase 1	HGNC:7758	6p21.33				+	Cerebellar ataxia with other neurological features
267	NF1	neurofibromin 1	HGNC:7765	17q11.2				+	Cerebellar ataxia
268	NFASC	neurofascin	HGNC:29866	1q32.1				+	Cerebellar ataxia and demyelinating neuropathy
269	NFU1	NFU1 iron-sulfur cluster scaffold	HGNC:16287	2p13.3		+	Spastic paraplegia
270	NGLY1	N-glycanase 1	HGNC:17646	3p24.2				+	Cerebellar ataxia
271	NHLRC1	NHL repeat containing E3 ubiquitin protein ligase 1	HGNC:21576	6p22.3				+	Cerebellar ataxia with other neurological features/Seizures, extrapyramidal signs, and dementia without disabling myoclonus and ataxia
272	NIPA1	NIPA magnesium transporter 1	HGNC:17043	15q11.2		+	Spastic paraplegia/Spastic paraplegia with peripheral neuropathy/Spastic paraplegia, autosomal dominant/Sspastic paraplegia with epilepsy	+	Cerebellar ataxia/Spastic ataxia/Spastic ataxia
273	NKX2-1	NK2 homeobox 1	HGNC:11825	14q13.3				+	Ataxia, benign hereditary chorea and dystonia/Ataxia, benign hereditary chorea, hypothyroidism, and a pituitary mass/Ataxia, childhood-onset/Cerebellar ataxia/Hypothyroidism, neonatal respiratory distress, and ataxia
274	NKX6-2	NK6 homeobox 2	HGNC:19321	10q26.3				+	Spastic ataxia 8/Spastic ataxia 8, autosomal recessive, with hypomyelinating leukodystrophy/Spastic ataxia, progressive, and hypomyelination
275	NOL3	nucleolar protein 3	HGNC:7869	16q22.1				+	Cerebellar ataxia
276	NOP56	NOP56 ribonucleoprotein	HGNC:15911	20p13	+			+	Spinocerebellar ataxia 36/Spinocerebellar ataxia 36
277	NPC1	NPC intracellular cholesterol transporter 1	HGNC:7897	18q11.2				+	Ataxia/Ataxia, early-onset/Ataxia, early-onset/Cerebellar ataxia/Niemann-Pick disease, type C with early-onset ataxia
278	NPC2	NPC intracellular cholesterol transporter 2	HGNC:14537	14q24.3				+	Ataxia, early-onset/Ataxia, early-onset
279	NRDC	nardilysin convertase	HGNC:7995	1p32.3				+	Global developmental delay and ataxia
280	NSL1	NSL1 component of MIS12 kinetochore complex	HGNC:24548	1q32.3		+	Intellectual disability & spastic paraplegia
281	NT5C2	5'-nucleotidase, cytosolic II	HGNC:8022	10q24.32-q24.33		+	Spastic paraplegia/Spastic paraplegia 45/Spastic paraplegia 65
282	NUBPL	nucleotide binding protein like	HGNC:20278	14q12				+	Progressive nystagmus, cerebellar ataxia, pyramidal signs & slurred speech
283	NUP93	nucleoporin 93	HGNC:28958	16q13				+	Ataxia, non-progressive congenital
284	OFD1	OFD1 centriole and centriolar satellite protein	HGNC:2567	Xp22.2				+	Cerebellar ataxia (metabolic presentation)
285	OPA1	OPA1 mitochondrial dynamin like GTPase	HGNC:8140	3q29		+	Optic atrophy & spastic paraplegia/Optic atrophy plus (including spastic paraplegia)/Spastic paraplegia	+	Cerebellar ataxia/Optic atrophy, ataxia & neuropathy/Optic atrophy, deafness & ataxia/Optic atrophy, gait ataxia, dysartha, learning impairment and metabolic stroke/Optic atrophy, gait ataxia, dysarthria, learning impairment and metabolic stroke/Progressive external ophthalmoplegia & ataxia/Spastic ataxia (cellebellar and pyramidal signs)
286	OPA3	outer mitochondrial membrane lipid metabolism regulator OPA3	HGNC:8142	19q13.32				+	Optic atrophy, chorea, cerebellar ataxia & dystonia
287	OPHN1	oligophrenin 1	HGNC:8148	Xq12				+	Mental retardation, seizures, ataxia, hypotonia
288	OPTN	optineurin	HGNC:17142	10p13				+	Ataxia/Dystonia/Spasticity/Myotonia
289	OTUD4	OTU deubiquitinase 4	HGNC:24949	4q31.21				+	Hypogonadotropic hypogonadism, ataxia & dementia
290	PAFAH1B3	platelet activating factor acetylhydrolase 1b catalytic subunit 3	HGNC:8576	19q13.1				+	Mental retardation, ataxia & atrophy of the brain
291	PARS2	prolyl-tRNA synthetase 2, mitochondrial	HGNC:30563	1p32.3				+	Seizures, nystagmus, ataxia, generalized dystonia and microcephaly
292	PCDH12	protocadherin 12	HGNC:8657	5q31.3				+	Cerebellar ataxia, dystonia, retinopathy & dysmorphism
293	PCNA	proliferating cell nuclear antigen	HGNC:8729	20p12.3				+	?Ataxia-telangiectasia-like disorder 2/Ataxia telangiectasia-like DNA repair disorder
294	PCYT2	phosphate cytidylyltransferase 2, ethanolamine	HGNC:8756	17q25.3		+	Spastic paraplegia
295	PDHA1	pyruvate dehydrogenase E1 subunit alpha 1	HGNC:8806	Xp22.12				+	Mitochondrial ataxia
296	PDYN	prodynorphin	HGNC:8820	20p13	+			+	Cerebellar ataxia/Cerebellar ataxia (metabolic presentation)/Spinocerebellar ataxia 23/Spinocerebellar ataxia 23
297	PEX10	peroxisomal biogenesis factor 10	HGNC:8851	1p36.32				+	Ataxia/Slowly progressive cerebellar ataxia
298	PEX2	peroxisomal biogenesis factor 2	HGNC:9717	8q21.13				+	Cerebellar ataxia, autosomal recessive
299	PEX6	peroxisomal biogenesis factor 6	HGNC:8859	6p21.1				+	Ataxia/Cerebellar ataxia, autosomal recessive
300	PEX7	peroxisomal biogenesis factor 7	HGNC:8860	6q23.3				+	Episodic ataxia
301	PGAP1	post-GPI attachment to proteins inositol deacylase 1	HGNC:25712	2q33.1		+	Spastic paraplegia 67
302	PIGG	phosphatidylinositol glycan anchor biosynthesis class G	HGNC:25985	4p16.3				+	Intellectual disability, cerebellar hypoplasia, cerebellar ataxia and seizures
303	PIGS	phosphatidylinositol glycan anchor biosynthesis class S	HGNC:14937	17q11.2				+	Cerebellar ataxia/Global development delay, seizures, hypotonia, weakness, ataxia and facial dysmorphism
304	PIK3R5	phosphoinositide-3-kinase regulatory subunit 5	HGNC:30035	17p13.1				+	Ataxia-ocular apraxia 2/Ataxia-oculomotor apraxia 3
305	PLA2G6	phospholipase A2 group VI	HGNC:9039	22q13.1		+	Spastic paraplegia/Spastic paraplegia with cerebellar atrophy and mental retardation/Spastic paraplegia with parkinsonism	+	Ataxia/Ataxia, adult-onset/Cerebellar ataxia with oculomotor apraxia-like phenotype/Spastic ataxia (cellebellar and pyramidal signs)/Spastic ataxia (cellebellar and pyramidal signs)
306	PLD3	phospholipase D family member 3	HGNC:17158	19q13.2	+			+	?Spinocerebellar ataxia 46/Spinocerebellar ataxia
307	PLEKHG4	pleckstrin homology and RhoGEF domain containing G4	HGNC:24501	16q22.1				+	Cerebellar ataxia, autosomal dominant
308	PLP1	proteolipid protein 1	HGNC:9086	Xq22.2		+	Hereditary spastic paraplegia type 2/Spastic paraplegia/Spastic Paraplegia/Spastic paraplegia 2/Spastic paraplegia type 2, X-linked
309	PLTP	phospholipid transfer protein	HGNC:9093	20q13.12				+	Ataxia with vitamin E deficiency
310	PMM2	phosphomannomutase 2	HGNC:9115	16p13.2				+	Cerebellar ataxia/Cerebellar ataxia (metabolic presentation)
311	PMPCA	peptidase, mitochondrial processing subunit alpha	HGNC:18667	9q34.3	+			+	Cerebellar ataxia/Developmental delay, epilepsy, ataxia & mitochondrial dysfunction/Failure to thrive, psychomotor delay & spastic-ataxia gait with bilateral Babinski sign/Spinocerebellar ataxia, autosomal recessive/Spinocerebellar ataxia, autosomal recessive 2
312	PNKP	polynucleotide kinase 3'-phosphatase	HGNC:9154	19q13.33				+	Ataxia with oculomotor apraxia, type 4/Ataxia with oculomotor apraxia, type 4 & pilocytic astrocytoma/Ataxia-oculomotor apraxia 4 & pilocytic astrocytoma/Ataxia-oculomotor apraxia 4| Microcephaly, seizures, and developmental delay
313	PNPLA6	patatin like phospholipase domain containing 6	HGNC:16268	19p13.2		+	Spastic paraplegia/Spastic paraplegia, autosomal recessive	+	Ataxia/Boucher-Neuhäuser syndrome with late-onset ataxia/Cerebellar ataxia/Spastic ataxia (cellebellar and pyramidal signs)/Sporadic ataxia/Sporadic ataxia / Gordon Holmes syndrome
314	POLG	DNA polymerase gamma, catalytic subunit	HGNC:9179	15q26.1	+			+	Asymmetric ataxia, depression, memory loss, epilepsy, and axonal neuropathy/Ataxia, epilepsy & cataract/Cerebellar ataxia/Cerebellar ataxia & sensory neuropathy/Cerebellar ataxia (metabolic presentation)/Depression, ataxia and cardiomyopathy/Hereditary spinocerebellar ataxia with peripheral neuropathy/Mitochondrial ataxia/Mitochondrial DNA depletion syndrome 4A (Alpers type)| Mitochondrial DNA de…
315	POLG2	DNA polymerase gamma 2, accessory subunit	HGNC:9180	17q23.3				+	Syndromic sensory neuropathy, late - onest with ataxia and parkinsonism
316	POLR1C	RNA polymerase I and III subunit C	HGNC:20194	6p21.1				+	Ataxia, Dyskinesia, Dystonia, MRO leukodystrophy/Childhood ataxia with leukodystrophy
317	POLR2A	RNA polymerase II subunit A	HGNC:9187	17p13.1		+	Spastic paraplegia
318	POLR3A	RNA polymerase III subunit A	HGNC:30074	10q22.3		+	Spastic paraplegia/Spastic Paraplegia/Spastic paraplegia & dystonia	+	Ataxia and spastic paraparesis/Cerebellar ataxia/Developmental delay, seizures, ataxia, hypertonia, spasticity/Spastic ataxia/Spastic ataxia/Tremor-ataxia with central hypomyelinating leukodystrophy
319	POLR3B	RNA polymerase III subunit B	HGNC:30348	12q23.3				+	Cerebellar ataxia
320	POMGNT2	protein O-linked mannose N-acetylglucosaminyltransferase 2 (beta 1,4-)	HGNC:25902	3p22.1				+	Cerebellar ataxia
321	PPP2R2B	protein phosphatase 2 regulatory subunit Bbeta	HGNC:9305	5q32	+			+	Spinocerebellar ataxia 12/Spinocerebellar ataxia 12
322	PQBP1	polyglutamine binding protein 1	HGNC:9330	Xp11.23		+	Mental retardation, microphthalmia, choroid coloboma, microcephaly, renal hypoplasia and spastic paraplegia
323	PRICKLE1	prickle planar cell polarity protein 1	HGNC:17019	12q12				+	Cerebellar ataxia (metabolic presentation)/Progressive myoclonus epilepsy-ataxia syndrome
324	PRKCG	protein kinase C gamma	HGNC:9402	19q13.42	+			+	Cerebellar ataxia/Cerebellar ataxia, late-onset, with pyramidal signs/Progressive cerebellar ataxia/Spastic ataxia (cellebellar and pyramidal signs)/Spinocerebellar ataxia/Spinocerebellar ataxia 14/Spinocerebellar ataxia 14/Spinocerebellar ataxia 14, late-onset
325	PRKN	parkin RBR E3 ubiquitin protein ligase	HGNC:8607	6q26				+	Global developmental delay, hypotonia, ataxia, scoliosis and pes planovalgus
326	PRRT2	proline rich transmembrane protein 2	HGNC:30500	16p11.2				+	Acute-onset ataxia with transient cerebellar diffusion restriction/Progressive ataxia
327	PSAP	prosaposin	HGNC:9498	10q22.1				+	Ataxia
328	PSEN1	presenilin 1	HGNC:9508	14q24.2				+	Alzheimer disease, early-onset, with cerebellar ataxia/Ataxia, Parkinsonism, spasticity, dystonia, action tremor, myoclonus, bulbar symptoms, seizures, halluc & behav changes/Cerebellar ataxia
329	PTRH2	peptidyl-tRNA hydrolase 2	HGNC:24265	17q23.1				+	Ataxia, childhood-onset/Global developmental delay, hearing loss and ataxia
330	PUM1	pumilio RNA binding family member 1	HGNC:14957	1p35.2	+			+	Cerebellar ataxia/Developmental delay and ataxia/Pumilio 1 associated developmental delay, ataxia and seizure syndrome/Pumilio 1-related cerebellar ataxia, adult onset/Spinocerebellar ataxia 47
331	RAB3GAP2	RAB3 GTPase activating non-catalytic protein subunit 2	HGNC:17168	1q41		+	Spastic paraplegia 69
332	RAD21	RAD21 cohesin complex component	HGNC:9811	8q24.11				+	Overgrowth, macrocephaly, intellectual disability, ataxia
333	RARS2	arginyl-tRNA synthetase 2, mitochondrial	HGNC:21406	6q15				+	Ataxia/Cerebellar ataxia, head tremor, hyperreflexia/seizure, delayed development and spasticity/Psychomotor retardation, autism and ataxia
334	REEP1	receptor accessory protein 1	HGNC:25786	2p11.2		+	Spastic paraplegia/Spastic paraplegia 31
335	REEP2	receptor accessory protein 2	HGNC:17975	5q31.2		+	Spastic paraplegia
336	RELN	reelin	HGNC:9957	7q22.1		+	Epilepsy
337	RETREG1	reticulophagy regulator 1	HGNC:25964	5p15.1		+	Sensory neuropathy with spastic paraplegia
338	RFC1	replication factor C subunit 1	HGNC:9969	4p14				+	Ataxia, late-onset
339	RNASEH2B	ribonuclease H2 subunit B	HGNC:25671	13q14.3		+	Spastic paraplegia/Spastic paraplegia, uncomplicated
340	RNF170	ring finger protein 170	HGNC:25358	8p11.21		+	Spastic paraplegia	+	Ataxia, sensory, 1, autosomal dominant/Sensory ataxia, autosomal dominant
341	RNF216	ring finger protein 216	HGNC:21698	7p22.1				+	Ataxia & chorea/Cerebellar ataxia/Cerebellar ataxia (metabolic presentation)/Cerebellar ataxia and hypogonadotropic hypogonadism/Hypogonadotropic hypogonadism, ataxia & dementia
342	RNU12	RNA, U12 small nuclear	HGNC:19380	22q13.2				+	Cerebellar ataxia, early-onset
343	RORA	RAR related orphan receptor A	HGNC:10258	15q22.2				+	Intellectual developmental disorder with or without epilepsy or cerebellar ataxia
344	RPL10	ribosomal protein L10	HGNC:10298	Xq28				+	Intellectual disability with facial dysmorphism, ataxia, microcephaly and epilepsy
345	RTN2	reticulon 2	HGNC:10468	19q13.32		+	Spastic paraplegia 12
346	RTN4IP1	reticulon 4 interacting protein 1	HGNC:18647	6q21				+	Optic atrophy 10 with or without ataxia, mental retardation, and seizures
347	RUBCN	rubicon autophagy regulator	HGNC:28991	3q29	+			+	?Spinocerebellar ataxia, autosomal recessive 15/Ataxia, recessive/Intellectual disability and ataxia
348	SACS	sacsin molecular chaperone	HGNC:10519	13q12.12		+	Spastic paraplegia/Spastic paraplegia & ataxia/Spastic paraplegia, non-ataxic, and peripheral neuropathy	+	Ataxia/Ataxia, childhood-onset/Ataxia, early-onset/Ataxia, early-onset/Ataxia, nystagmus, dysarthria, hearing impairment and retinal degeneration/Cerebellar ataxia/Cerebellar ataxia (metabolic presentation)/Cerebellar ataxia, autosomal recessive/Friedreich ataxia-like/Sacsin-related ataxia/Spastic ataxia/Spastic ataxia/Spastic ataxia (cellebellar and pyramidal signs)/Spastic ataxia, Charlevoix-Sa…
349	SAMD9L	sterile alpha motif domain containing 9 like	HGNC:1349	7q21.2				+	Ataxia-pancytopaenia syndrome/Ataxia-pancytopenia syndrome
350	SARS2	seryl-tRNA synthetase 2, mitochondrial	HGNC:17697	19q13.2				+	?Neurodevelopmental disorder with microcephaly, ataxia, and seizures
351	SCARB2	scavenger receptor class B member 2	HGNC:1665	4q21.1				+	Cerebellar ataxia with other neurological features
352	SCN1A	sodium voltage-gated channel alpha subunit 1	HGNC:10585	2q24.3				+	Episodic ataxia/Intellectual disability, ataxia, stroke-like episodes & seizures/Speech delay, Intellectual disability, Ataxia, Seizures, Cerebral atrophy
353	SCN1B	sodium voltage-gated channel beta subunit 1	HGNC:10586	19q13.11				+	Episodic ataxia
354	SCN2A	sodium voltage-gated channel alpha subunit 2	HGNC:10588	2q24.3				+	Ataxia, childhood-onset/Epilepsy, neonatal with episodic ataxia, late-onset/Epilepsy, vertigo & episodic ataxia/Epileptic encephalopathy with early onset developmental delay, intermittent ataxia and hypotonia/Episodic ataxia/Episodic ataxia and impairment of speech development/Neonatal epilepsy, late-onset ataxia, myoclonus & pain/Neonatal seizures with paroxysmal ataxia
355	SCN8A	sodium voltage-gated channel alpha subunit 8	HGNC:10596	12q13.13				+	?Cognitive impairment with or without cerebellar ataxia| Epileptic encephalopathy, early infantile, 13| Seizures, benign familial infantile, 5/Ataxia/Ataxia, childhood-onset/Cerebellar atrophy, ataxia & mental retardation/Cognitive impairment with or without cerebellar ataxia/Epileptic encephalopathy, early infantile, 13/Early onset benign epilepsy, normal cognitive development, ataxia and myoclo…
356	SCN9A	sodium voltage-gated channel alpha subunit 9	HGNC:10597	2q24.3				+	Episodic ataxia
357	SCYL1	SCY1 like pseudokinase 1	HGNC:14372	11q13.1	+			+	Cerebellar ataxia, recurrent liver failure, peripheral neuropathy and short stature/Liver failure, peripheral neuropathy and ataxia/Liver failure, peripheral neuropathy, cerebellar atrophy & ataxia/Spinocerebellar ataxia, autosomal recessive 21/Spinocerebellar ataxia, autosomal recessive 21
358	SDHA	succinate dehydrogenase complex flavoprotein subunit A	HGNC:10680	5p15.33				+	Optic atrophy, ataxia, myopathy
359	SELENOI	selenoprotein I	HGNC:29361	2p23.3		+	Spastic paraplegia, sensorineural-deafness, blindness and seizures
360	SEPSECS	Sep (O-phosphoserine) tRNA:Sec (selenocysteine) tRNA synthase	HGNC:30605	4p15.2				+	Microcephaly and progressive cerebellar ataxia/Neurodegenrative disease, ataxia, nystagmus, dysarthria, diplegia, limb weakness, hypertonic lower limbs and upgoing plantar
361	SERAC1	serine active site containing 1	HGNC:21061	6q25.3		+	Hereditary spastic paraplegia, complicated
362	SETX	senataxin	HGNC:445	9q34.13	+	+	Spastic paraplegia	+	Amyotrophic lateral sclerosis 4, juvenile| Spinocerebellar ataxia, autosomal recessive 1/Ataxia/Ataxia with neuropathy/Ataxia with oculomotor apraxia/Ataxia, nystagmus, slurred speech, dysmetria, dysdiadochokinesia, slightly reduced reflexes, and cerebellar atrophy/Ataxia-ocular apraxia 2/Ataxia-ocular apraxia 2, atypical/Cerebellar ataxia/Cerebellar ataxia (metabolic presentation)/Cerebellar ata…
363	SGCE	sarcoglycan epsilon	HGNC:10808	7q21.3				+	Myoclonus ataxia, progressive
364	SH3TC2	SH3 domain and tetratricopeptide repeats 2	HGNC:29427	5q32				+	Ataxia
365	SIL1	SIL1 nucleotide exchange factor	HGNC:24624	5q31.2				+	Ataxia telangiectasia-like syndrome/Cerebellar ataxia and atrophy
366	SKOR2	SKI family transcriptional corepressor 2	HGNC:32695	18q21.1				+	Cerebellar ataxia
367	SLC16A2	solute carrier family 16 member 2	HGNC:10923	Xq13.2		+	Spastic paraplegia
368	SLC1A3	solute carrier family 1 member 3	HGNC:10941	5p13.2				+	Cerebellar ataxia/Cerebellar ataxia, late-onset, with pyramidal signs/Episodic ataxia/Episodic ataxia 6/Episodic ataxia type 6/Episodic ataxia, type 6/Episodic ataxia/hemiplegia/seizures
369	SLC20A2	solute carrier family 20 member 2	HGNC:10947	8p11.21				+	Cerebellar ataxia
370	SLC25A32	solute carrier family 25 member 32	HGNC:29683	8q22.3				+	Ataxia, myoclonia, dysarthria, muscle weakness and exercise intolerance
371	SLC25A46	solute carrier family 25 member 46	HGNC:25198	5q22.1				+	Cerebellar Ataxia/Cerebellar ataxia/Optic atrophy, axonal neuropathy and ataxia/Progressive myoclonic ataxia with optic atrophy & neuropathy
372	SLC2A1	solute carrier family 2 member 1	HGNC:11005	1p34.2		+	Spastic paraplegia	+	Ataxia/Ataxia, childhood-onset/Febrile seizures, ataxia, hypotonia & hypermobility
373	SLC33A1	solute carrier family 33 member 1	HGNC:95	3q25.31		+	Spastic paraplegia/Spastic paraplegia 42/Spastic paraplegia, autosomal dominant
374	SLC35A2	solute carrier family 35 member A2	HGNC:11022	Xp11.23		+	Developmental delay, spastic paraplegia, mild cerebral atrophy & delayed myelination
375	SLC52A2	solute carrier family 52 member 2	HGNC:30224	8q24.3	+			+	Cerebellar ataxia/Cerebellar ataxia, autosomal recessive/Progressive ataxia with hearing impairment, optic atrophy and sensorimotor neuropathy/Spinocerebellar ataxia with blindness & deafness, type 2/Static ataxia
376	SLC9A1	solute carrier family 9 member A1	HGNC:11071	1p36.11				+	Cerebellar ataxia/Intellectual disability, ataxia and cerebellar atrophy
377	SNX14	sorting nexin 14	HGNC:14977	6q14.3	+			+	Cerebellar ataxia/Cerebellar ataxia (metabolic presentation)/Cerebellar ataxia and intellectual disability, autosomal recessive/Intellectual disability, ataxia, cerebellar atrophy, coarse facial features and hypertrichosis/Intellectual disability, cerebellar ataxia & atrophy, hearing loss, progressively coarsening facial features & macrocephaly/Spinocerebellar ataxia/Spinocerebellar ataxia 20/Spi…
378	SOD1	superoxide dismutase 1	HGNC:11179	21q22.11				+	Cerebellar ataxia
379	SOX2	SRY-box transcription factor 2	HGNC:11195	3q26.33				+	Gait ataxia & dystonia
380	SPART	spartin	HGNC:18514	13q13.3		+	Spastic paraplegia	+	Ataxia/Global developmental delay, microcephaly, failure to thrive, ataxia, dysarthria and strabismus
381	SPAST	spastin	HGNC:11233	2p22.3		+	Spastic paraplegia/Spastic Paraplegia/Spastic paraplegia 4/Spastic paraplegia 4 with cerebelllar ataxia & cognitive impairment/Spastic paraplegia, autosomal dominant/Spastic paraplegia, modifier of/Spastic paraplegia, silver syndrome type/Spastic paraplegia, type 4/Spastic paraplegia, uncomplicated	+	Cerebellar ataxia/Spastic paraplegia 4 with cerebelllar ataxia & cognitive impairment
382	SPG11	SPG11 vesicle trafficking associated, spatacsin	HGNC:11226	15q21.1		+	Spastic paraplegia/Spastic Paraplegia/Spastic paraplegia 11/Spastic paraplegia 11 & dementia/Spastic paraplegia with thin corpus callosum/Spastic paraplegia with thin corpus callosum, atypical/Spastic paraplegia, atypical/Spastic paraplegia, autosomal recessive/Spastic paraplegia, complex/Spastic paraplegia, late-onset	+	Ataxia/Cerebellar ataxia/Spastic ataxia (cellebellar and pyramidal signs)
383	SPG21	SPG21 abhydrolase domain containing, maspardin	HGNC:20373	15q22.31		+	Spastic paraplegia
384	SPG7	SPG7 matrix AAA peptidase subunit, paraplegin	HGNC:11237	16q24.3	+	+	Spastic paraplegia/Spastic paraplegia 7/Spastic paraplegia, autosomal recessive	+	Ataxia/Cerebellar ataxia/Cerebellar ataxia (metabolic presentation)/Cerebellar ataxia with spasticity/Cerebellar ataxia with spasticity & waddling gait/Cerebellar ataxia, adult-onset/Cerebellar ataxia, autosomal recessive/Spastic ataxia/Spastic ataxia/Spastic ataxia (cellebellar and pyramidal signs)/Spastic ataxia and syndromic parkinsonism/Spinocerebellar ataxia/Spinocerebellar ataxia 19
385	SPTAN1	spectrin alpha, non-erythrocytic 1	HGNC:11273	9q34.11		+	Spastic paraplegia, autosomal recessive	+	Ataxia, global developmental delay, small cerebellum, hypotonia and hypothyroidism/Cerebellar ataxia
386	SPTB	spectrin beta, erythrocytic	HGNC:11274	14q23.3		+	Amyotrophic lateral sclerosis
387	SPTBN2	spectrin beta, non-erythrocytic 2	HGNC:11276	11q13.2	+			+	Ataxia/Cerebellar ataxia/Cerebellar ataxia (metabolic presentation)/Episodic ataxia/Spastic ataxia (cellebellar and pyramidal signs)/Spinocerebellar ataxia 5/Spinocerebellar ataxia 5, infantile-onset/Spinocerebellar ataxia 5| Spinocerebellar ataxia, autosomal recessive 14/Spinocerebellar ataxia, autosomal recessive, 14
388	SPTBN4	spectrin beta, non-erythrocytic 4	HGNC:14896	19q13.2				+	Speech delay, Intellectual disability, Ataxia, Seizures, Cerebral atrophy
389	SQSTM1	sequestosome 1	HGNC:11280	5q35.3				+	Cerebellar ataxia, progressive, childhood-onet with vertical gaze palsy/Failure to thrive, fine/gross motor delay, speech delay, ataxia, generalized dystonia/Frontotemporal dementia and/or amyotrophic lateral sclerosis 3| Myopathy, distal, with rimmed vacuoles| Neurodegeneration with ataxia, dystonia, and gaze palsy, childhood-onset| Paget disease of bone 3/Neurodegeneration, childhood onset with…
390	SRD5A3	steroid 5 alpha-reductase 3	HGNC:25812	4q12				+	Cerebellar ataxia & congenital eye malformations
391	STUB1	STIP1 homology and U-box containing protein 1	HGNC:11427	16p13.3	+			+	?Spinocerebellar ataxia 48| Spinocerebellar ataxia, autosomal recessive 16/Ataxia/Ataxia & hypogonadism/Ataxia with myoclonus/Ataxia, childhood-onset/Cerebellar ataxia/Dysarthria, ataxia, and cervical dystonia/Spastic ataxia/Spastic ataxia/Spinocerebellar ataxia/Spinocerebellar ataxia 16/Spinocerebellar ataxia 48
392	STXBP1	syntaxin binding protein 1	HGNC:11444	9q34.11				+	Ataxia-tremor-retardation syndrome/Cerebellar ataxia
393	SUCLA2	succinate-CoA ligase ADP-forming subunit beta	HGNC:11448	13q14.2				+	Psychomotor delay, deafness, myopathy, ataxia & chorea
394	SVBP	small vasohibin binding protein	HGNC:29204	1p34.2				+	Intellectual disability, microcephaly, ataxia and muscular hypotonia
395	SYNE1	spectrin repeat containing nuclear envelope protein 1	HGNC:17089	6q25.2	+	+	Intellectual disability, spastic paraplegia, axon neuropathy & leukoencephalopathy	+	Ataxia/Ataxia and mental retardation/Ataxia with retained reflexes/Cerebellar ataxia/Cerebellar ataxia plus/Cerebellar ataxia type 1, autosomal recessive/Cerebellar ataxia type 8/Cerebellar ataxia with cognitive impairment/Cerebellar ataxia with motor neuron disease/Cerebellar ataxia, Congenital cerebellar hypoplasia & cognitive impairment/Cerebellar ataxia, late-onset, with pyramidal signs/Emery…
396	SYNGAP1	synaptic Ras GTPase activating protein 1	HGNC:11497	6p21.32				+	Global developmental delay, epilepsy & ataxia
397	SYT14	synaptotagmin 14	HGNC:23143	1q32.2	+			+	?Spinocerebellar ataxia, autosomal recessive 11/Ataxia/Spinocerebellar ataxia with psychomotor retardation
398	TBC1D24	TBC1 domain family member 24	HGNC:29203	16p13.3				+	Cortical myoclonus with cerebellar ataxia/Paroxysmal movement disorder and episodic ataxia
399	TBK1	TANK binding kinase 1	HGNC:11584	12q14.2				+	Cerebellar ataxia/Progressive cerebellar ataxia
400	TBP	TATA-box binding protein	HGNC:11588	6q27	+			+	{Parkinson disease, susceptibility to}| Spinocerebellar ataxia 17/Ataxia/Ataxia, cognitive impairment and seizures/Behavioral disorder, dementia, ataxia, and rigidity
401	TCTN1	tectonic family member 1	HGNC:26113	12q24.11				+	Ataxia, childhood-onset
402	TDP1	tyrosyl-DNA phosphodiesterase 1	HGNC:18884	14q32.11	+			+	Ataxia/Cerebellar ataxia/Spinocerebellar ataxia with axonal neuropathy/Spinocerebellar ataxia, autosomal recessive with axonal neuropathy
403	TDP2	tyrosyl-DNA phosphodiesterase 2	HGNC:17768	6p22.3	+			+	Intellectual disability, seizures and ataxia/Spinocerebellar ataxia, autosomal recessive/Spinocerebellar ataxia, autosomal recessive 23
404	TECPR2	tectonin beta-propeller repeat containing 2	HGNC:19957	14q32.33		+	Spastic paraplegia 49
405	TFG	trafficking from ER to golgi regulator	HGNC:11758	3q12.2		+	Spastic paraplegia/Spastic paraplegia, optic atrophy, and neuropathy/Speech delay and spastic paraplegia
406	TGM6	transglutaminase 6	HGNC:16255	20p13	+	+	Spastic paraplegia and ataxia	+	Ataxia/Cerebellar ataxia/Episodic ataxia/Spastic paraplegia and ataxia/Spinocerebellar ataxia/Spinocerebellar ataxia 35/Spinocerebellar ataxia 35
407	THG1L	tRNA-histidine guanylyltransferase 1 like	HGNC:26053	5q33.3				+	Cerebellar ataxia and developmental delay/Intellectual disability with ataxia/Mitochondrial autosomal recessive cerebellar ataxia
408	TINF2	TERF1 interacting nuclear factor 2	HGNC:11824	14q12				+	Ataxia pancytopenia syndrome
409	TMEM240	transmembrane protein 240	HGNC:25186	1p36.33	+			+	Ataxia/Cerebellar ataxia/Spinocerebellar ataxia 21/Spinocerebellar ataxia 21
410	TOMM70	translocase of outer mitochondrial membrane 70	HGNC:11985	3q12.2				+	Hypotonia, hyper-reflexia, ataxia, dystonia and white matter abnormalities
411	TPK1	thiamin pyrophosphokinase 1	HGNC:17358	7q35				+	Recurrent ataxia
412	TPP1	tripeptidyl peptidase 1	HGNC:2073	11p15.4	+			+	Ataxia/Ataxia, childhood-onset/Ataxia, progressive, childhood-onset/Ceroid lipofuscinosis, neuronal, 2| Spinocerebellar ataxia, autosomal recessive 7/Spinocerebellar ataxia/Spinocerebellar ataxia/Spinocerebellar ataxia 7
413	TRAPPC11	trafficking protein particle complex subunit 11	HGNC:25751	4q35.1				+	Myopathy, infantile hyperkinetic movements, ataxia, and intellectual disability
414	TRIO	trio Rho guanine nucleotide exchange factor	HGNC:12303	5p15.2				+	Cerebellar ataxia
415	TRPC3	transient receptor potential cation channel subfamily C member 3	HGNC:12335	4q27	+			+	?Spinocerebellar ataxia 41/Cerebellar ataxia
416	TRPV4	transient receptor potential cation channel subfamily V member 4	HGNC:18083	12q24.11		+	Spastic paraplegia
417	TSEN54	tRNA splicing endonuclease subunit 54	HGNC:27561	17q25.1				+	Ataxia, late-onset
418	TSFM	Ts translation elongation factor, mitochondrial	HGNC:12367	12q14.1				+	Ataxia, childhood-onset & cardiomyopathy, nonobstructive/Global development delay, seizures, ventricular hypertrophy and ataxia/Optic atrophy, peripheral neuropathy & ataxia
419	TTBK2	tau tubulin kinase 2	HGNC:19141	15q15.2	+			+	Cerebellar ataxia/Episodic ataxia/Spastic ataxia (cellebellar and pyramidal signs)/Spinocerebellar ataxia 11/Spinocerebellar ataxia, type 11
420	TTC19	tetratricopeptide repeat domain 19	HGNC:26006	17p12	+			+	Ataxia/Cerebellar ataxia, spastic paraparesis & deep sensory impairment/Spinocerebellar ataxia, autosomal recessive
421	TTPA	alpha tocopherol transfer protein	HGNC:12404	8q12.3				+	Ataxia with isolated vitamin E deficiency/Ataxia with isolated vitamin E deficiency/Ataxia with vitamin E deficiency/Ataxia with vitamin E deficiency and retinitis pigmentosa/Ataxia with vitamin E deficiency, retinitis pigmentosa and macular degeneration/Sensory ataxia/Spastic ataxia (cellebellar and pyramidal signs)
422	TUBB2A	tubulin beta 2A class IIa	HGNC:12412	6p25.2		+	Progressive spastic paraplegia, peripheral sensory-motor polyneuropathy & ataxia	+	Progressive spastic paraplegia, peripheral sensory-motor polyneuropathy & ataxia
423	TUBB4A	tubulin beta 4A class IVa	HGNC:20774	19p13.3		+	Hereditary spastic paraplegia/Spastic paraplegia/Spastic paraplegia, early-onset progressive	+	Ataxia/Ataxia/Cerebellar ataxia
424	TWNK	twinkle mtDNA helicase	HGNC:1160	10q24.31	+			+	Ataxia/Ataxia, infantile onset with hearing loss/Ataxia, sensorineural hearing loss and optic nerve atrophy/Cerebellar ataxia/Cerebellar ataxia (metabolic presentation)/Cerebellar ataxia, adult-onset, sensorineural hearing loss and sensory neuropathy/Spinocerebellar ataxia, hearing loss, optic atrophy, peripheral neuropathy & hypergonadotropic hypogonadism/Spinocerebellar ataxia, infantile onset
425	UBA5	ubiquitin like modifier activating enzyme 5	HGNC:23230	3q22.1	+			+	Cerebellar ataxia/Epileptic encephalopathy, developmental delay, intellectual disability, movement disorder, cerebellar atrophy & ataxia/Epileptic encephalopathy, early infantile, 44| ?Spinocerebellar ataxia, autosomal recessive 24
426	UBAP1	ubiquitin associated protein 1	HGNC:12461	9p13.3		+	Spastic paraplegia/Spastic paraplegia, autosomal dominant
427	UBE3A	ubiquitin protein ligase E3A	HGNC:12496	15q11.2				+	Episodic ataxia
428	UBR4	ubiquitin protein ligase E3 component n-recognin 4	HGNC:30313	1p36.13				+	Developmental regression, brain atrophy, ataxia/Episodic ataxia
429	UCHL1	ubiquitin C-terminal hydrolase L1	HGNC:12513	4p13		+	Spastic paraplegia 79
430	UNC80	unc-80 homolog, NALCN channel complex subunit	HGNC:26582	2q34		+	Spastic paraplegia, global developmental delay, and failure to thrive
431	USP8	ubiquitin specific peptidase 8	HGNC:12631	15q21.2		+	Spastic paraplegia 59
432	USP9X	ubiquitin specific peptidase 9 X-linked	HGNC:12632	Xp11.4				+	Ataxia
433	VAMP1	vesicle associated membrane protein 1	HGNC:12642	12p13.31		+	Spastic paraplegia	+	Myasthenic syndrome, congenital, 25| Spastic ataxia 1, autosomal dominant/Spastic ataxia/Spastic ataxia
434	VARS2	valyl-tRNA synthetase 2, mitochondrial	HGNC:21642	6p21.33				+	Muscle and central nervous system defects with progr. ext. ophthalmoparesis, ptosis, and ataxia
435	VCP	valosin containing protein	HGNC:12666	9p13.3		+	Hereditary spastic paraplegia/Spastic paraplegia
436	VLDLR	very low density lipoprotein receptor	HGNC:12698	9p24.2				+	Ataxia with vitamin E deficiency/Cerebellar ataxia with intellectual disability/Cerebellar ataxia, mental retardation and dysequilibrium syndrome/Intellectual disability and severe ataxia
437	VPS13D	vacuolar protein sorting 13 homolog D	HGNC:23595	1p36.22-p36.21	+	+	Spastic paraplegia	+	Spinocerebellar ataxia, autosomal recessive 4
438	VPS53	VPS53 subunit of GARP complex	HGNC:25608	17p13.3		+	Complicated hereditary spastic paraplegia
439	VWA3B	von Willebrand factor A domain containing 3B	HGNC:28385	2q11.2	+			+	?Spinocerebellar ataxia, autosomal recessive 22/Cerebellar ataxia with intellectual disability
440	WASHC5	WASH complex subunit 5	HGNC:28984	8q24.13		+	Complicated spastic paraplegia, autosomal dominant/Spastic paraplegia/Spastic paraplegia 8
441	WDPCP	WD repeat containing planar cell polarity effector	HGNC:28027	2p15				+	Cerebellar vermis hypoplasia, ataxia & retinal dystrophy
442	WDR48	WD repeat domain 48	HGNC:30914	3p22.2		+	Spastic paraplegia 60
443	WDR81	WD repeat domain 81	HGNC:26600	17p13.3				+	Cerebellar ataxia/Cerebellar ataxia, mental retardation & dysequilibrium syndrome/Cerebellar ataxia, mental retardation, and dysequilibrium syndrome 2| Hydrocephalus, congenital, 3, with brain anomalies
444	WFS1	wolframin ER transmembrane glycoprotein	HGNC:12762	4p16.1				+	Ataxia/Cerebellar ataxia/Optic atrophy, diabetes & ataxia/Optic atrophy, diabetes, hearing loss & ataxia
445	WNK1	WNK lysine deficient protein kinase 1	HGNC:14540	12p13.33				+	Cerebellar ataxia
446	WWOX	WW domain containing oxidoreductase	HGNC:12799	16q23.1-q23.2	+			+	Cerebellar ataxia with epilepsy & mental retardation/Epileptic encephalopathy, early infantile, 28| Esophageal squamous cell carcinoma, somatic| Spinocerebellar ataxia, autosomal recessive 12/Epileptic encephalopathy, early infantile/Spinocerebellar ataxia, autosomal recessive/Spinocerebellar ataxia 12, Autosomal recessive
447	XRCC1	X-ray repair cross complementing 1	HGNC:12828	19q13.31	+			+	?Spinocerebellar ataxia, autosomal recessive 26/Cerebellar ataxia/Cerebellar ataxia & peripheral neuropathy
448	XRCC4	X-ray repair cross complementing 4	HGNC:12831	5q14.2				+	Microcephaly & progressive ataxia
449	ZBTB18	zinc finger and BTB domain containing 18	HGNC:13030	1q44				+	Developmental delay, absent speech, therapy-refractory seizures, ataxia, muscular hypotonia and facial dysmorphism
450	ZFR	zinc finger RNA binding protein	HGNC:17277	5p13.3		+	Spastic paraplegia 71
451	ZFYVE26	zinc finger FYVE-type containing 26	HGNC:20761	14q24.1		+	Spastic paraplegia/Spastic paraplegia with thin corpus callosum/Spastic paraplegia, autosomal recessive/Spastic paraplegia, complex	+	Ataxia/Cerebellar ataxia
452	ZFYVE27	zinc finger FYVE-type containing 27	HGNC:26559	10q24.2		+	Spastic paraplegia/Spastic paraplegia, autosomal dominant	+	Cerebellar ataxia
