# Supplementary material for: Integrated whole exome sequencing and functional approach delineate genetic heterogeneity in cerebellar ataxias
Source: Research Square preprint supplement (doi:10.21203/rs.3.rs-757408/v1), 2021-08-02
Supplement: Supplementary file 8 [file bcd53c26ea71a3ca033adff4.xlsx]

## Sheet: Clinically relevant variant
S.N.	Patient ID	Group	Gender-Age (onset)	Clinical Features of Patients	MRI Brain	WES Design	Gene	Phenotype, Phenotype MIM Number, Inheritance (OMIM)	HGVS neucleotide change (GRCH38)	HGVS neucleotide change (GRCH37)	HGVS RNA change	HGVS protein change	Disease model (variant state)	Allele state	Variant frequency status	dbSNP ID	Variant Type	Frequency 1000GP	Frequency gnomAD_Total	Number of Het (gnomAD)	Number of Hmz (gnomAD)	Frequency in In-house data	SIFT_pred	Polyphen2_HVAR_pred	MutationTaster_pred	CADD_phred	Sanger validation	Family based Segregation (Remark)	Frequency in 257 ethinically matched controls	HGMD status	ClinVar Classification	Intervar automated	Intervar automated	Intervar adjusted	Intervar adjusted (class)	Varsome automated	Varsome automated (Class)	Final variant class	DNA change (gnomeAD format)
Families with definitive diagnostic with pathogenic and/ or likely pathogenic variants
Variants in Spinocerebellar ataxia genes
1	AT1682	ADCA	M-54 (53.5)	Gait, dysarthria, hyperreflexia, bradykinesia, psychiatric involvment, small fibre neuropathy(b/l)	Diffuse cerebral and cerebellar atrophys	S-WES	AFG3L2	Spinocerebellar ataxia 28, 610246, Autosomal dominant	NC_000018.10:g.12337343T>C	NC_000018.9:g.12337342T>C	NM_006796.3:c.2173A>G	NP_006787.2:p.Lys725Glu	AD	Het	Rare	rs561135750	Missense	0.0002	3.977e-06	1	Absent	Absent	T	D	D	24.2	Yes	N.A.	N.A.	Absent	Absent	PM1,PM2,BS2	VUS	PM1,PM2,PP2,PP3	Likely Pathogenic	PM2,PP2,PP3	VUS	Likely Pathogenic	18-12337342-T-C
2	AT2521	ADCA	F-42 (35)	Gait, intetion tremor,dysarthria, nystagmous, aggression, babinski sign	MRI-NA	S-WES	TTBK2	Spinocerebellar ataxia 11, 604432, Autosomal dominant	NC_000015.10:g.42777134_42777135CT	NC_000015.9:g.43069332_43069333CT	NM_173500.4:c.1304_1305GA	NP_775771.3:p.Asp436fs	AD	Het	Rare	rs318240735	Frameshift	Absent	Absent	Absent	Absent	Absent	N.A.	N.A.	N.A.	N.A.	Yes	Segregated (Present in affected family member)	N.A.	CD104909	Pathogenic	Absent	Absent	PVS1,PM2,PP3,PP5	Pathogenic	PVS1,PM2,PP3,PP5	Pathogenic	Pathogenic	15-43069331-TCT-T,
3	AT2221	ADCA	M-17 (15)	Gait, Intention tremor, dysarthria, babinski sign, slow saccades	Mild cerebellar atrophy	F-WES	FAT2	Spinocerebellar ataxia 45,617769, Autosomal dominant	NC_000005.10:g.151544348A>T	NC_000005.9:g.150923909A>T	NM_001447.2:c.6779T>A	NP_001438.1:p.Val2260Asp	AD	Het	Novel	Absent	Missense	Absent	Absent	Absent	Absent	Absent	D	D	D	26.3	Yes	Absent in unaffected mother	N.A.	Absent	Absent	PM1,PM2,PP3	VUS	PM1,PM2,PP1,PP3	Likely Pathogenic	PM2,PP3,BP1	VUS	Likely Pathogenic	5-150923909-A-T
4	AT2832	ADCA	F-55 (43)	Intetion tremor, dysarthria, head tremor, nystagmous, hyperreflexia,dysdiadochokinesia, bradykinesia, postural tremor	NCCT-Normal	F-WES	MME	?Spinocerebellar ataxia 43, 617018, Autosomal dominant	NC_000003.12:g.155142263G>A	NC_000003.11:g.154860052G>A	NM_000902.4:c.1121G>A	NP_000893.2:p.Arg374Lys	AD	Het	Rare	rs753114582	Missense	Absent	3.987e-06	1	Absent	0.001332	D	D	D	27.4	Yes	Segregated ( Present in affected family member)	N.A.	Absent	Absent	PM1,PM2,PP3,BP1	VUS	PM1, PM2,PP1,PP2,PP3,BP1	Likely Pathogenic	PM1,PM2,PP2,PP3	Likely Pathogenic	Likely Pathogenic	3-154860052-G-A
5	AT2166	SPEOCA	M-40 (29)	Gait, dysarthria	Mild Cerebellar atrophy	S-WES	TMEM240	Spinocerebellar ataxia 21, 607454, Autosomal dominant	NC_000001.11:g.1535372G>A	NC_000001.10:g.1470752G>A	NM_001114748.2:c.509C>T	NP_001108220.1:p.Pro170Leu	AD	Het	Rare	rs606231451	Missense	Absent	Absent	Absent	Absent	Absent	D	B	D	31	Yes	N.A.	N.A.	Absent	Pathogenic	PM2,PP2,PP5	VUS	PM2,PP2,PP3,PP4,PP5	Likely pathogenic	PM2,PP2,PP3,PP5	Pathogenic	Pathogenic	1-1470752-G-A
6	AT2705	SPEOCA	F-18 (12)	Gait, dysarthria, nystagmous, bradykinesia	N.A.	S-WES	GRM1	Spinocerebellar ataxia 44, 617691, Autosomal dominant	NC_000006.12:g.146399642G>C	NC_000006.11:g.146720778G>A	NM_001278064.1:c.2603G>C	NP_001264993.1:p.Arg868Pro	AD	Het	Rare	rs766272199	Missense	Absent	4.01e-06	1	Absent	Absent	D	B	D	28.4	Yes	N.A.	N.A.	Absent	Absent	PM2,PP3	VUS	PM1,PM2,PP3,PP4	Likely Pathogenic	PM2,PP3,BP1	VUS	Likely Pathogenic	6-146720778-G-C
7	AT2176	SPEOCA	F-26 (24)	Gait, intetion tremor, vision impairment, dysarthria, head tremor, nystagmous, mild bradykinesia, psychiatric involvement	N.A.	S-WES	FAT1	Spinocerebellar ataxias, N.A., Autosomal dominant	NC_000004.12:g.186707207G>A	NC_000004.11:g.187628361G>A	NM_005245.4:c.2621C>T	NP_005236.2:p.Thr874Met	AD	Het	Rare	rs1203002890	Missense	Absent	Absent	Absent	Absent	Absent	D	D	D	23.7	Yes	N.A.	N.A.	Absent	Absent	PM1,PM2	VUS	PM1,PM2,PP3,PP4	Likely pathogenic	PM2,PP3,BP1	VUS	Likely pathogenic	4-187628361-G-A
8	AT1798	SPLOCA	M-55 (53.5)	Gait, intention tremor, dysarthria, nystagmous	Mild cerebral and cerebellar atrophy	S-WES	EEF2	?Spinocerebellar ataxia 26, 609306, Autosomal dominant	NC_000019.10:g.3984195C>G	NC_000019.9:g.3984193C>G	NM_001961.4:c.159G>C	NP_001952.1:p.53Glu53Asp	AD	Het	Novel	Absent	Missense	Absent	Absent	Absent	Absent	Absent	T	D	D	22.3	Yes	N.A.	N.A.	Absent	Absent	PM1,PM2	VUS	PM1,PM2, PP3, PP4	Likely pathogenic	PM2, BP1, BP4	Likely Benign	Likely pathogenic	19-3984193-C-G
9	AT1889	SPLOCA	M-49 (44)	Gait, dysarthria, nystagmus, dysdiadochokinesia, absent reflexes, bradykinesia, slow saccades	Mild cerebellar atrophy	S-WES	ELOVL5	Spinocerebellar ataxia 38, 615957, Autosomal dominant	NC_000006.12:g.53270660C>A	NC_000006.11:g.53135458C>A	NM_021814.5:c.689G>T	NP_068586.1:p.Gly230Val	AD	Het	Rare	rs587777670	Missense	Absent	Absent	Absent	Absent	Absent	T	P	D	27.6	Yes	Absent in unaffected, asymtomatic members	0	Absent	Pathogenic	PM2,PP2,PP5	VUS	PM1,PM2,PP2,PP3,PP5	Likely Pathogenic	PM1,PM2,PP3,PP5	Likely Pathogenic	Pathogenic	6-53135458-C-A
10	AT2216	SPLOCA	M-71 (57)	Gait, nystagmous, bradykinesia, broken pursuit, absent SSR in LL with small fibre neuropathy, seizure, prostatomegaly, haemorrhoids	Age related atrophic changes	S-WES	KCNC3	Spinocerebellar ataxia 13, 605259, Autosomal dominant	NC_000019.10:g.50323757G>A	NC_000019.9:g.50827014G>A	NM_004977.2:c.1196C>T	NP_004968.2:p.Ser399Leu	AD	Het	Rare	rs1437049667	Missense	Absent	Absent	Absent	Absent	Absent	T	D	D	25	Yes	Asymtomatic family members)	N.A.	Absent	Absent	PM1,PM2,PP3	VUS	PM1, PM2, PP3, PP4	Likely Pathogenic	PM2,PP3,BP1	VUS	Likely Pathogenic	19-50827014-G-A
11	AT1864	SPLOCA	F-68 (66.5)	Gait,intetion tremor, dysarthria, hyperreflexia	Prominent b/l cerebellar atrophy; NCCT- prominance of cerebellar folia and prominent sulcal spaces in frontal region (atrophy)	S-WES	SPTBN2	Spinocerebellar ataxia 5, 600224 (3), Autosomal dominant	NC_000011.10:g.66708154C>T	NC_000011.9:g.66475625C>T	NM_006946.4:c.1337G>A	NP_008877.2:p.Arg446His	AD	Het	Rare	rs931035058	Missense	Absent	Absent	Absent	Absent	Absent	D	P	D	35	Yes	N.A.	N.A.	Absent	Absent	PM2	VUS	PM1, PM2, PP3, PP4	Likely Pathogenic	PM2,PP3,BP1	VUS	Likely Pathogenic	11-66475625-C-T
12	AT2137	ADCA	M-38 (31)	Gait, intetion tremor, dysarthria, hyperreflexia, babinski sign, dysdiadochokinesia, bradykinesia	Normal	S-WES	SETX	Cerebellar ataxias, N.A., Autosomal dominant	NC_000009.12:g.132311853C>T	NC_000009.11:g.135187240C>T	NM_015046.7:c.5278G>A	NP_055861.3:p.Ala1760Thr	AD	Het	Rare	rs764316153	Missense	Absent	1.999e-05	5	Absent	Absent	D	P	D	32	Yes	Segregated ( Present in affected family member)	0	Absent	VUS	PM2,PP3	VUS	PM1,PM2,PP1,PP3,PP4	Likely pathogenic	PM2,PP3	VUS	Likely pathogenic	9-135187240-C-T
Variants in Spinocerebellar ataxia, autosomal recessive genes
13	AT2880	SPEOCA	F-12 (10)	Gait,intetion tremor, dysarthria, nystagmus, absent reflexes, bradykinesia, slow saccades, broken pursuit, elevated AFP	Cerebellar atrophy	S-WES	ATM	Ataxia-telangiectasia, 208900, Autosomal recessive	NC_000011.10:g.108329238G>A	NC_000011.9:g.108199965G>A	NM_000051.4:c.7307G>A	NP_000042.3:p.Arg2436Lys	AR (CHet)	Het	Rare	rs786203394	Missense	Absent	4.024e-06	1	Absent	Absent	T	P	D	25.6	Yes	CHet confirmed in parents	0	Absent	Uncertain significance	PM1,PM2,PP3,BP1	VUS	PVS1,PM1,PM2,PM3,PP3,BP1	Pathogenic	PVS1,PM1,PM2,PP3	Likely pathogenic	Pathogenic	11-108199965-G-A
									NC_000011.10:g.108304809_108304813delinsA	NC_000011.9:g.108175536_108175540delinsA	NM_000051.4:c.5631_5635delinsA	NP_000042.3:p.Phe1877Leufs		Het	Rare	rs758852420	Frameshift	Absent	Absent	Absent	Absent	Absent	N.A.	N.A.	N.A.	N.A.	Yes	CHet confirmed in parents	N.A.	Absent	Pathogenic	Absent	Absent	PVS1,PM2,PP5	Pathogenic	PVS1,PM2,PP5	Pathogenic	Pathogenic	11-108175536-CTCGC-A
14	AT2278	SPEOCA	F-30 (4)	Gait, intetion tremor, dysarthria, nystagmous, hyperreflexia, babinski sign, bradykinesia, slow saccades, broken pursuit, Demyelinating SMA Neuropathy(b/l)	Cerebellar atrophy	S-WES	SACS	Spastic ataxia, Charlevoix-Saguenay type, 270550, Autosomal recessive	NC_000013.11:g.23365194-23365195delAA	NC_000013.10:23939333_23939334delAA	NM_014363.6:c.429_430del	NP_055178.3:p.Trp144Valfs	AR (Hmz)	Hmz	Rare	rs1555255328	Frameshift	Absent	Absent	Absent	Absent	Absent	N.A.	N.A.	N.A.	N.A.	Yes	Parents carrier	N.A.	Absent	Absent	Absent	Absent	PVS1,PM2,PP3	Pathogenic	PVS1,PM2,PP3	Pathogenic	Pathogenic	13-23939331-CAA-C
15	AT1018	SPEOCA	F-31 (20)	Gait, intetion tremor, dysarthria, nystagmus, absent reflexes, bradykinesia, broken pursuit, occulomotor apraxia, pes cavus, SMA Neuropathy(b/l)	Atrophy of vermis more than the cerebellar hemisphere seen	S-WES	SETX	Spinocerebellar ataxia, autosomal recessive 1, 606002, Autosomal recessive	NC_000009.12:g.132277136G>A	NC_000009.11:g.135152523G>A	NM_015046.7:c.6859C>T	NP_055861.3:p.Arg2287Ter	AR (CHet)	Het	Rare	rs1339011741	Stopgain	Absent	3.99e-06	N.A.	Absent	Absent	N.A.	N.A.	A	48	Yes	CHet confirmed in parents	N.A.	CM111221	Absent	PVS1,PM2,PP3	Pathogenic	PVS1,PM2,PP3	Pathogenic	PVS1,PM2,PP3	Pathogenic	Pathogenic	9-135152523-G-A
									NC_000009.12:g.132328975_132328978del	NC_000009.11:g.135204362_135204365del	NM_015046.7:c.2623_2626del	NP_055861.3:p.Val875Phefs		Het	Rare	rs757168693	Frameshift	Absent	4.111e-06	1	Absent	Absent	N.A.	N.A.	N.A.	N.A.	Yes	CHet confirmed in parents	N.A.	Absent	Absent	Absent	Absent	PVS1,PM2	Pathogenic	PVS1,PM2	Likely pathogenic	Pathogenic	9-135204358-ATAAC-A
16	AT1554	SPEOCA	M-28 (16)	Gait,intetion tremor, dysarthria, head tremor, nystagmus, absent reflexes, bradykinesia, slow saccades,broken pursuit, SMA polyneuropathy	Cerebellar atrophy	S-WES			NC_000009.12:g.132296909A>C	NC_000009.11:g.135172296A>C	NM_015046.7:c.5927T>G	NP_055861.3:p.Leu1976Arg	AR (CHet)	Het	Rare	rs121434379	Missense	Absent	1.591e-05	4	Absent	Absent	D	D	A	29.3	Yes	CHet confirmed in parents	0	CM050777	Pathogenic	PM1,PM2,PP3,PP5	Likely pathogenic	PM1,PM2,PP3,PP5	Likely pathogenic	PM2,PP3,PP5	VUS	Pathogenic	9-135172296-A-C
									NC_000009.12:g.132331316T>C	NC_000009.11:g.135206703T>C	NM_015046.7:c.971A>G	NP_055861.3:p.Tyr324Cys		Het	Novel	Absent	Missense	Absent	Absent	Absent	Absent	Absent	D	D	D	25.2	Yes	CHet confirmed in parents	0	Absent	Absent	PM2	VUS	PM2,PM3,PP3,PP4	Likely pathogenic	PM2,PP3	VUS	Likely pathogenic	9-135206703-T-C
17	AT2807	SPEOCA	M-16 (8)	Gait, intention tremor, dysarthria, nystagmous, bradykinesia, slow saccades, broken pursuit	Mild atrophy of cerebellum	S-WES			NC_000009.12:g.132271792T>C	NC_000009.11:g.135147179T>C	NM_015046.7:c.7117A>G	NP_055861.3:p.Thr2373Ala	AR (CHet)	Het	Novel	Absent	Missense	Absent	Absent	Absent	Absent	Absent	D	D	D	25.8	Yes	CHet confirmed in parents	N.A.	CM087873, T>G reported	Absent	PM1,PM2,PP3	VUS	PM1,PM2,PM5,PP3,PP4	Likely pathogenic	PM2,PP3	VUS	Likely pathogenic	9-135147179-T-C
									NC_000009.12:g.132283337C>T	NC_000009.11:g.135158724C>T	NM_015046.7:c.6473G>A	NP_055861.3:p.Gly2158Ala		Het	Novel	Absent	Missense	Absent	Absent	Absent	Absent	Absent	D	D	D	32	Yes	CHet confirmed in parents	0	Absent	Absent	PM1,PM2,PP3	VUS	PM1,PM2,PM3,PP3,PP4	Likely pathogenic	PM2,PP3	VUS	Likely pathogenic	9-135158724-C-T
Variants in Herediatary Spastic paraplegia and other neurological disorders genes in autosomal recessive mode
18	AT1796	ADCA	M-39 (28)	Gait, nystagmous, hyperreflexia/ clonus, babinski sign, dysdiadochokinesia, bradykinesia, rigidity	Normal	F-WES	CAPN1	Spastic paraplegia 76, autosomal recessive, 616907, Autosomal recessive	NC_000011.10:g.65186237G>A	NC_000011.9:g.64953708G>A	NM_005186.4:c.658G>A	NP_005177.2:p.Gly220Arg	AR (Hmz)	Hmz	Rare	rs567507506	Missense	0.0002	4.025e-06	1	Absent	Absent	D	D	D	32	Yes	Segregated ( Present in affected family member)	N.A.	Absent	Absent	PM1,PM2,PP3	VUS	PM1,PM2,PP1,PP2,PP3,PP4	Likely pathogenic	PM1,PM2,PP2,PP3	Likely pathogenic	Likely pathogenic	11-64953708-G-A
19	AT1756	SPLOCA	M-46 (43)	Gait, dysarthria, dysdiadochokinesia, hyperreflexia, babinski sign, slow saccades	Hot cross bun-pons, mild cerebellar atrophy/ cortical	S-WES	SPG7	Spastic paraplegia 7, autosomal recessive, 607259, Autosomal recessive, Autosomal dominant	NC_000016.10:g.89531977T>A	NC_000016.9:g.89598385G>C	NM_003119.4:c.1061G>C	NP_003110.1:p.Gly354Ala	AR (CHet)	Het	Rare	Absent	Missense	Absent	Absent	Absent	Absent	Absent	D	D	D	27.6	Yes	N.A.	0	CM131104	Absent	PM1,PM2,PP3	VUS	PM1,PM2,PM3,PP3,PP4,PP5	Likely pathogenic	PM1,PM2,PP2,PP3	Likely pathogenic	Pathogenic	16-89598385-G-C
									NC_000016.10:g.89510539T>A	NC_000016.9:g.89576947T>A	NM_003119.4:c.233T>A	NP_003110.1:p.Leu78Ter		Het	Rare	rs121918358	Stopgain	Absent	0.000418	105	2	0.00133	N.A.	N.A.	A	24	Yes	N.A.	0	CM081826	Pathogenic	PVS1,PM2,PP5	Pathogenic	PVS1,PM2,PP4,PP5	Pathogenic	PVS1,PM2,PP5,BP4	Pathogenic	Pathogenic	16-89576947-T-A
20	AT1941	SPEOCA	M-36 (16)	Gait, nystagmus, hyperreflexia, bradykinesia, psychiatric involvment, sensory peripheral neuropathy/small fibre neuropathy	N.A.	S-WES			NC_000016.10:g.89510539T>A	NC_000016.9:g.89576947T>A	NM_003119.4:c.233T>A	NP_003110.1:p.Leu78Ter	AR (Hmz)	Hmz	Rare	rs121918358	Stopgain	Absent	0.000418	105	2	0.00133	N.A.	N.A.	A	24	Yes	Parents carrier	0	CM081826	Pathogenic	PVS1,PM2,PP5	Pathogenic	PVS1,PM2,PP4,PP5	Pathogenic	PVS1,PM2,PP5,BP4	Pathogenic	Pathogenic	16-89576947-T-A
21	AT2037	SPEOCA	M-38 (24)	Gait,intetion tremor, dysarthria, head tremor, hyperreflexia, spasticity, babinski sign, postural tremor, bradykinesia, rigidity	Mild Diffuse cerebral/ cerebellar atrophy	S-WES	GBA2	Spastic paraplegia 46, autosomal recessive, 614409, Autosomal recessive	NC_000009.12:g.35737774C>T	NC_000009.11:g.35737771C>T	NM_020944.3:c.2479G>A	NP_065995.1:p.Gly827Arg	AR (Hmz)	Hmz	Rare	rs746421010	Missense	Absent	7.953e-06	2	Absent	Absent	D	P	D	24.8	Yes	N.A.	0	Absent	Absent	PM1,PM2	VUS	PM1,PM2,PP3,PP4	Likely pathogenic	PM2,PP3,BP1	VUS	Likely pathogenic	9-35737771-C-T
22	AT2028	SPEOCA	F-19 (11)	Gait, Intention tremor, dysarthria, hyperreflexia, dysdiadochokinesia, postural tremor, seizure	Normal	S-WES	CEP290	Joubert syndrome 5, 610188, Autosomal recessive	NC_000012.12:g.88083133A>G	NC_000012.11:g.88476910A>G	NM_025114.4:c.4910T>C	NP_079390.3:p.Leu1637Pro	AR (Hmz)	Hmz	Rare	rs368886655	Missense	0.0002	5.913e-05	10	Absent	Absent	D	D	D	28.9	Yes	N.A.	0.0118577	Absent	Absent	PM2,PP3,BP1	VUS	PM1,PM2,PP3,PP4,BP1	Likely pathogenic	PM2,PP3	VUS	Likely pathogenic	12-88476910-A-G
23	AT1876	SPEOCA	M-26 (24)	Childhood onset cerebellar ataxia, Secondary dystonia (Clinical diagnosis)	N.A.	S-WES	GPR88	?Chorea, childhood-onset, with psychomotor retardation, 616939, Autosomal recessive	NC_000001.11:g.100539209C>G	NC_000001.10:g.101004765C>G	NM_022049.3:c.243C>G	NP_071332.2:p.Cys81Trp	AR (Hmz)	Hmz	Novel	Absent	Missense	Absent	Absent	Absent	Absent	Absent	D	D	D	28.9	Yes	N.A.	N.A.	Absent	Absent	PM1,PM2,BP1	VUS	PM1,PM2,PP3,PP4,BP1	Likely pathogenic	PM2	VUS	Likely pathogenic	1-101004765-C-G
24	AT2808	SPEOCA	M-19 (6)	Gait, intention tremor, dysarthria, broken purcuit	NCCT- Cerebellar Atrophy	S-WES	NPC1	Niemann-Pick disease, type C1, 257220, Autosomal recessive; Niemann-Pick disease, type D, 257220, Autosomal recessive	NC_000018.10:g.23544406T>A	NC_000018.9:g.21124370G>A	NM_000271.5:c.2068A>T	NP_000262.2:p.Ile690Phe	AR (Hmz)	Hmz	Novel	Absent	Missense	Absent	Absent	Absent	Absent	Absent	D	D	D	33	Yes	Parents carrier	0	Absent	Absent	PM1,PM2,PP3	VUS	PM1,PM2,PP2,PP3	Likely pathogenic	PM1,PM2,PP2,PP3	Likely pathogenic	Likely pathogenic	18-21124370-T-A
25	AT2560	SPEOCA	F-14 (8)	Gait, Intention tremor, dysarthria, dysdiadochokinesia,slow saccades,opthalmoplegia, sensory Neuropathy (b/l), scoliosis	Diffuse cerebellar atrophy including vermis and bilateral middle cerebellar peduncles	S-WES	RELN	Lissencephaly 2 (Norman-Roberts type), 257320, Autosomal recessive	NC_000007.14:g.103553802C>G	NC_000007.13:g.103194249C>G	NM_005045.4:c.5827G>C	NP_005036.2:p.Asp1943His	AR (Hmz)	Hmz	Rare	rs756833440	Missense	Absent	4.38e-05	11	Absent	0.001332	T	D	D	27.8	Yes	Parents carrier	0	Absent	Absent	PM2	VUS	PM1,PM2,PP3,PP4	Likely pathogenic	PM2	VUS	Likely pathogenic	7-103194249-C-G
Families with probable diagnostic likely pathogenic variants
26	AT2910	ADCA	M-22 (18)	Dysarthria, hyperreflexia/ clonus	Severe atrophy of cerebellum and vermis with mild brain stem atrophy. Possibly of olivoponto-cerebellar degeneration.	S-WES	SLC2A1	GLUT1 deficiency syndrome 1, infantile onset, severe, 606777, autosomal recessive; GLUT1 deficiency syndrome 2, childhood onset, 612126, Autosomal dominant	NC_000001.11:g.42927082C>T	NC_000001.10:g.43392753C>T	NM_006516.3:c.1438G>A	NP_006507.2:p.Glu480Lys	AD	Het	Rare	rs756304012	Missense	Absent	1.592e-05	4	Absent	Absent	T	B	D	19.82	No	N.A.	N.A.	N.A.	VUS	PM2	VUS	PM1,PM2,PP2,PP3	Likely Pathogenic	PM1,PM2,PP2,BP4	VUS	Likely Pathogenic	1-43392753-C-T
									NC_000001.11:g.42929936A>G	NC_000001.10:g.43395607A>G	NM_006516.3:c.616T>C	NP_006507.2:p.Phe206Leu	AD	Het	Rare	rs1304291329	Missense	Absent	3.977e-06	1	Absent	Absent	T	B	D	17.99	No	N.A.	N.A.	N.A.	Absent	PM1,PM2	VUS	PM1,PM2,PP2,PP3	Likely Pathogenic	PM2,PP2,BP4	VUS	Likely Pathogenic	1-43395607-A-G
27	AT2029	SPLOCA	M-52(50.5)	Gait, Intention tremor, dysarthria	Mild cerebral hemisphere atrophy and b/l mild cerebellar atrophy	S-WES	FAT1	Spinocerebellar ataxia, N.A., Autosomal dominant	NC_000004.12:g.186628304G>A	NC_000004.11:g.187549458G>A	NM_005245.4:c.660G>A	NP_005236.2:p.Asp1554Asn	AD	Het	Rare	rs748147223	Missense	Absent	1.21e-05	3	Absent	Absent	T	D	D	34	No	N.A.	N.A.	Absent	Absent	PM1,PM2,PP3	VUS	PM1,PM2,PP3,PP4	Likely Pathogenic	PM1,PM2,PP3,BP1	uncertain significance	Likely Pathogenic	4-187549458-C-T
28	AT1965	ADCA	M-37(34)	Gait, Intention tremor, dysarthria, hyperreflexia, babinski sign, dysdiadochokinesia,bradykinesia	Normal	S-WES	EMC1	Cerebellar atrophy, visual impairment, and psychomotor retardation, 616875, autosomal recessive	NC_000001.11:g.19244925-19244926T	NC_000001.10:g.19571419-19571420T	NM_015047.3:c.200dupA	NP_055862.1:p.Asn67LysfsTer13	AD	Het	Novel	Absent	frameshift insertion	Absent	Absent	Absent	Absent	Absent	N.A.	N.A.	N.A.	N.A.	No	N.A.	N.A.	Absent	Absent	N.A.	N.A.	N.A.	Pathogenic	PVS1,PM2,PP3	Pathogenic	Pathogenic	1-19571419 - T
29	AT1943	SPEOCA	F-43(38)	Gait, Intention tremor, dysarthria, hyperreflexia, dysdiadochokinesia,seizure	Cerebellar atrophy	S-WES	DNMT1	Cerebellar ataxia, deafness, and narcolepsy, 604121, autosomal dominant	NC_000019.10:g.10142119T>C	NC_000019.9:g.10252795T>C	NM_001130823.3:c.3218A>G	NP_001124295.1:p.Gln1073Arg	AD	Het	Novel	Absent	Missense	Absent	Absent	Absent	Absent	Absent	T	B	D	17.11	No	N.A.	N.A.	Absent	Absent	PM1,PM2	VUS	PM1,PM2,PP3,PP4	Likely Pathogenic	PM2,PP3,BP1	uncertain significance	Likely Pathogenic	19-10252795-T-C
30	AT1968	SPEOCA	F-27(24)	Gait,nystagmus,babinski sign,hypothyroidism	Diffuse cerebellar atrophy	S-WES	PSEN1	Alzheimer disease, type 3, 607822, autosomal dominant	NC_000014.9:g.73192663A>G	NC_000014.8:g.73659371A>G	NM_000021.4:c.568A>G	NP_000012.1:p.Asn190Asp	AD	Het	Rare	rs781431904	Missense	Absent	1.193e-05	3	Absent	Absent	T	P	D	24.7	No	N.A.	N.A.	Absent	Absent	PM2,PP3	VUS	PM1,PM2,PP2,PP3	Likely Pathogenic	PM2,PP2,PP3	uncertain significance	Likely Pathogenic	14-73659371-A-G
31	AT2099	SPEOCA	M-21 (7)	Gait, Intention tremor, dysarthria, areflexia	Normal	S-WES	NF1	Neurofibromatosis, type 1, 162200, Autosomal dominant	NC_000017.11:g.31229886A>G	NC_000017.10:g.29556904A>G	NM_001042492.2:c.2902A>G	NP_001035957.1:p.Met968Val	AD	Het	Rare	rs587781499	Missense	Absent	1.196e-05	3	Absent	Absent	T	B	D	22.1	No	N.A.	N.A.	Absent	VUS	PM1,PM2,BP1	VUS	PM1,PM2,PM5,PP2,PP3	Likely Pathogenic	PM2,PM5,PP2	uncertain significance	Likely Pathogenic	17-29556904-A-G
32	AT2834	SPLOCA	M-52(51)	Gait, Intention tremor, dysarthria	Marked atrophy of posterior fossa, olivopontocerebellar degeneration	S-WES	CTBP1	Hypotonia, ataxia, developmental delay, and tooth enamel defect syndrome, 617915, Autosomal dominant	NC_000004.12:g.1216017G>A	NC_000004.11:g.1209805G>A	NM_001328.3:c.736C>T	NP_001319.1:p.Leu246Phe	AD	Het	Rare	rs1376466934	Missense	Absent	Absent	Absent	Absent	Absent	D	D	D	26.4	No	N.A.	N.A.	Absent	Absent	PM1,PM2,PP2	VUS	PM1,PM2,PP2,PP3	Likely Pathogenic	PM2,PP3	uncertain significance	Likely Pathogenic	4-1209805-G-A
Families with variants of uncertain significance
New candidate gene
33	AT1929	SPEOCA	F-27 (23)	Gait, intention tremor, dysarthria, nystagmus, hyperreflexia, pes cavus, bradykinesia	Cerebellar atrophy (b/l)	F-WES	SPTB	Anemia, neonatal hemolytic, fatal and near-fatal; Elliptocytosis-3; Spherocytosis, type 2, 616649, Autosomal dominant	NC_000014.9:g.64793678G>A	NC_000014.8:g.65260396G>A	NM_001355436.2:c.1985C>T	NP_001342365.1:p.Ser662Phe	AR (CHet)	Het	Novel	Absent	Missense	Absent	Absent	Absent	Absent	Absent	D	D	D	26.9	Yes	CHet confirmed in parents	0	Absent	Absent	PM2,PP3	VUS	PM2,PP3	VUS	PM2,PP3	VUS	VUS	14-65260396-G-A
									NC_000014.9:g.64782409G>T	NC_000014.8:g.65249127G>T	NM_001355436.2:c.4147C>A	NP_001342365.1:p.Leu1383Met		Het	Rare	rs367610564	Missense	Absent	7.071e-05	20	1	0.003989	D	P	D	24	Yes	CHet confirmed in parents	0	Absent	Absent	PP3	VUS	PM2,PP3	VUS	PM2,PP3	VUS	VUS	14-65249127-G-T
Variants in CAs gene
34	AT2833	SPLOCA	M-53 (52)	Gait, intetion tremor, dysarthria, psychiatric involvment, SM neuropathy	Mild cerebellar and vermian atrophy	S-WES	SPTBN2	Spinocerebellar ataxia 5, 600224, Autosomal dominant	NC_000011.10:g.66691573T>C	NC_000011.9:g.66459044T>C	NM_006946.4:c.5276A>G	NP_008877.2:p.Asn1759Ser	AD	Het	Rare	rs201712933	Missense	Absent	0.0001276	36	Absent	0.0006667	D	B	D	22.8	Yes		0	Absent	Absent	PM2	VUS	PM2,PP3	VUS	PM2,BP1	VUS	VUS	11-66459044-T-C
35	AT1803	SPEOCA	M-31(30)	Gait, dysarthria, intention tremor, nystagmus, Seizure	B/L cerebellar atrophy	S-WES	KIF26B	Spinocerebellar ataxia, N.A., Autosomal dominant	NC_000001.11:g.245687754C>T	NC_000001.10:g.245851056C>T	NM_018012.4:c.4771C>T	NP_060482.2:p.Arg1591Trp	AD	Het	Rare	rs771032989	Missense	Absent	0.0000208	4	Absent	0.0006658	D	B	D	24.9	N.A.		N.A.	Absent	Absent	PM2,BP1	VUS	PM2,PP3,BP1	VUS	PM2,PP3,BP1	VUS	VUS	1:245851056 C T

## Sheet: Abb
AD	Autosomal Dominant
AR	Autosomal Resessive
N.A.	Not Available
Het	Heterozygous
CHet	Compound Heterozygous
Hmz	Homozygous Alternate
F	Female
M	Male
S-WES	Singleton whole exome sequencing
F-WES	Family members whole exome sequencing
