# Supplementary material for: Integrated whole exome sequencing and functional approach delineate genetic heterogeneity in cerebellar ataxias
Source: Research Square preprint supplement (doi:10.21203/rs.3.rs-757408/v1), 2021-08-02
Supplement: Supplementary file 9 [file eb39719a26f14085dcf0d2e5.xlsx]

## Sheet: Characterized
S.N.	Chr-Pos-Ref-Alt	Patient ID	Group	Gene	Phenotype, Phenotype MIM Number, Inheritance (OMIM)	HGVS neucleotide change (GRCH38)	HGVS neucleotide change (GRCH37)	HGVS RNA change	HGVS protein change	Allele state	dbSNP	Exonic Function	Frequency 1000GP	gnomAD Frequency	Number of heterozygotes (gnomeAD)	Number of homozygotes (gnomeAD)	Frequency in In-house data	SIFT_pred	Polyphen2_HVAR_pred	MutationTaster_pred	CADD_phred	Sanger Validation	Frequency in 257 ethinically matched control	HGMD status	ClinVar Classification	VarSome (evidence)	VarSome verdict	InterVar automated (evidence)	InterVar automated (Class)	InterVar adjusted (evidence)	InterVar adjusted (class)	Final variant class
Heterozygous pathogenic variants in autosomal recessive inheritance genes
1	12-977851-C-T	AT2099	SPEOCA	WNK1	Neuropathy, hereditary sensory and autonomic, type II, 201300, Autosomal recessive; Pseudohypoaldosteronism, type IIC, 614492, Autosomal dominant	NC_000012.12:g.868685C>T	NC_000012.11:g.977851C>T	NM_001184985.1:c.2959C>T	NP_001171914.1:p.Gln987Ter	Het	Absent	Nonsense	Absent	Absent	Absent	Absent	Absent	N.A.	N.A.	A	19.18	N.A.	N.A.	Absent	Absent	PVS1, PM2, PP3	Pathogenic	PVS1, PM2, PP3	Pathogenic	PVS1, PM2, PP3	Pathogenic	Pathogenic
2	2-201943669-T-C	AT2176	SPEOCA	NDUFB3	Mitochondrial complex I deficiency, nuclear type 25, 618246, Autosomal recessive	NC_000002.12:g.201078946T>C	NC_000002.11:g.201943669T>C	NM_002491.3:c.64T>C	NP_002482.1:p.Trp22Arg	Het	rs142609245	Missense	0.000399361	0.0008464	239	Absent	0.0006658	D	D	D	26.9	Yes	N.A.	CM120599	Pathogenic	PM2, PP5, PP3	Pathogenic	PM2, PP5, PP3	VUS	PM2, PP5, PP3	VUS	Pathogenic
3	1-20964566-C-T	AT2864	ADCA	PINK1	Parkinson disease 6, early onset, 605909, Autosomal recessive	NC_000001.11:g.20638073C>T	NC_000001.10:g.20964566C>T	NM_032409.3:c.619C>T	NP_115785.1:p.Arg207Ter	Het	rs774272854	Nonsense	5e-05	2.791e-05	7	Absent	Absent	N.A.	N.A.	A	34	N.A.	N.A.	Absent	Absent	PVS1, PM2, BP4	Likely pathogenic	PVS1,PM2	Likely pathogenic	PVS1,PM2	Likely pathogenic	Likely pathogenic
Pathogenic and likely pathogenic variant in autosomal dominant inheritance genes
4	7-75932182-G-A	AT1756	SPLOCA	HSPB1	Charcot-Marie-Tooth disease, axonal, type 2F, 606595, Autosomal dominant; Neuronopathy, distal hereditary motor, type IIB, 608634, Autosomal dominant	NC_000007.14:g.76302865G>A	NC_000007.13:g.75932182G>A	NM_001540.5:c.153G>A	NP_001531.1:p.Trp51Ter	Het	rs769118115	Nonsense	5e-05	9.919e-05	19	Absent	0.001344	N.A.	N.A.	A	38	N.A.	N.A.	Absent	Pathogenic	PVS1, PP5, PP3, BS2	Pathogenic	PM2, PP3	VUS	PVS1, PM2, PP5, PP3, BS2	Pathogenic	Pathogenic
5	13-20763490-C-T	AT1798	SPLOCA	GJB2	Deafness, autosomal recessive 1A, 220290, Autosomal recessive; Digenic dominant	NC_000013.11:g.20189351C>T	NC_000013.10:g.20763490C>T	NM_004004.6:c.231G>A	NP_003995.2:p.Trp77Ter	Het	rs80338944	Nonsense	3e-05	0.0001392	35	Absent	0.004667	N.A.	N.A.	A	38	N.A.	N.A.	CM970681	Pathogenic	PVS1, PM2, PP5, PP3	Pathogenic	PM2, PP3, PP5	VUS	PVS1, PM2, PP5, PP3	N.A.	Pathogenic
6	2-8946469-G-A	AT2278	SPEOCA	KIDINS220	Spastic paraplegia, intellectual disability, nystagmus, and obesity, 617296, Autosomal dominant	NC_000002.12:g.8806339G>A	NC_000002.11:g.8946469G>A	NM_020738.4:c.535C>T	NP_065789.1:p.Arg179Ter	Het	Absent	Nonsense	Absent	Absent	Absent	Absent	Absent	N.A.	N.A.	A	35	N.A.	N.A.	Absent	Absent	PVS1, PM2, PP3	Pathogenic	N.A.	N.A.	N.A.	N.A.	Pathogenic
7	2-241676559-C-T	AT1554	SPEOCA	KIF1A	Spastic paraplegia 30, autosomal recessive, 610357, Autosomal dominant; Autosomal recessive	NC_000002.12:g.240737142C>T	NC_000002.11:g.241676559C>T	NM_001244008.1:c.3928G>A	NP_001230937.1:p.Asp1310Asn	Het	rs371252476	Missense	Absent	9.979e-05	30	Absent	Absent	T	D	D	29	N.A.	N.A.	Absent	Likely benign	PM2,PP2,PP3	VUS	PM1,PM2,PP3	VUS	PM1,PM2,PP2, PP3	Likely pathogenic	Likely pathogenic
8	3-154884759-G-A	AT2807	SPEOCA	MME	?Spinocerebellar ataxia 43, 617018, Autosomal dominant	NC_000003.12:g.155166970G>A	NC_000003.11:g.154884759G>A	NM_000902.4:c.1729G>A	NP_000893.2:p.Gly577Ser	Het	Absent	Missense	Absent	Absent	Absent	Absent	Absent	D	D	D	33	N.A.	N.A.	Absent	Absent	PM1, PM2, PP2, PP3	Likely pathogenic	PM1, PM2, PP3, BP1	VUS	PM1, PM2, PP2, PP3	Likely pathogenic	Likely pathogenic
9	12-110232160-C-T	AT1798	SPLOCA	TRPV4		NC_000012.12:g.109794355C>T	NC_000012.11:g.110232160C>T	NM_021625.5:c.1465G>A	NP_067638.3:p.Ala489Thr	Het	rs758280554	Missense	Absent	7.202e-05	18	Absent	Absent	T	P	D	28.9	N.A.	N.A.	Absent	VUS	PM1, PP2, PP3, BS2	VUS	PM1, PM2, PP3	VUS	PM1, PM2, PP2, PP3, BS2	Likely pathogenic	Likely pathogenic
Variants of Uncertain significance
10	1-12409422-G-A	AT2560	SPEOCA	VPS13D	Spinocerebellar ataxia, autosomal recessive 4, 607317, Autosomal recessive	NC_000001.11:g.12349365G>A	NC_000001.10:g.12409422G>A	NM_015378.4:c.9422G>A	NP_056193.2:p.Arg3141Gln	Hmz	rs149431025	Missense	0.000798722	0.0005602	158	2	0.005992	N.A.	P	D	24.8	N.A.	N.A.	Absent	Absent	PM2, PP2, BP4	VUS	N.A.	VUS	PM2, PP2, BP4	VUS	VUS
11	14-102494343-T-A	AT1018	SPEOCA	DYNC1H1	Charcot-Marie-Tooth disease, axonal, type 20, 614228, Autosomal dominant; Mental retardation, autosomal dominant 13, 614563, Autosomal dominant; Spinal muscular atrophy, lower extremity-predominant 1, AD, 158600, Autosomal dominant	NC_000014.9:g.102028006T>A	NC_000014.8:g.102494343T>A	NM_001376.5:c.9333T>A	NP_001367.2:p.Ser3111Arg	Het	rs879254260	Missense	Absent	Absent	Absent	Absent	Absent	T	B	D	12.47	N.A.	N.A.	Absent	VUS	PM2, BP4	VUS	PM1, PM2, BP4	VUS	PM1, PM2, BP4	VUS	VUS
12	9-131329150-A-G	AT2166	SPEOCA	SPTAN1	Developmental and epileptic encephalopathy 5, 613477, Autosomal dominant	NC_000009.12:g.128566871A>G	NC_000009.11:g.131329150A>G	NM_001130438.3:c.131A>G	NP_001123910.1:p.Tyr44Cys	Het	rs368482631	Missense	Absent	7.955e-06	2	Absent	Absent	D	D	D	26.6	N.A.	N.A.	Absent	VUS	PM2, PP3, BP1	VUS	N.A.	VUS	PM2, PP3, BP1	VUS	VUS
13	1-203690497-C-T	AT1554	SPEOCA	ATP2B4	Familial Spastic paraplegia	NC_000001.11:g.203721369C>T	NC_000001.10:g.203690497C>T	NM_001684.5:c.2771C>T	NP_001675.3:p.Ala924Val	Het	rs1372440778	Missense	Absent	Absent	Absent	Absent	Absent	D	P	D	25.5	N.A.	N.A.	Absent	Absent	PM2, PP3, BP1	VUS	PM1, PM2, PP3	VUS	PM1, PM2, PP3, BP1	VUS	VUS
14	3-184045449-C-T	AT1554	SPEOCA	EIF4G1	Parkinson disease 18, 614251, Autosomal dominant	NC_000003.12:g.184327661C>T	NC_000003.11:g.184045449C>T	NM_001194947.1:c.3758C>T	NP_001181876.2:p.Ser1253Phe	Het	Absent	Missense	Absent	Absent	Absent	Absent	Absent	D	D	D	34	N.A.	N.A.	Absent	Absent	PM2, PP3, BP1	VUS	PM1, PM2	VUS	PM1, PM2, PP3, BP1	VUS	VUS
15	8-126095433-C-T	AT1929	SPEOCA	WASHC5	Complicated spastic paraplegia, autosomal dominant/Spastic paraplegia/Spastic paraplegia 8	NC_000008.11:g.125083191C>T	NC_000008.10:g.126095433C>T	NM_014846.4:c.254G>A	NP_055661.3:p.Arg85His	Het	rs763847351	Missense	Absent	7.976e-06	2	Absent	Absent	D	D	D	35	N.A.	N.A.	Absent	Absent	PM2, PP3	VUS	PM2, PP3	VUS	PM2, PP3	VUS	VUS
16	9-131339195-G-A	AT2037	SPEOCA	SPTAN1	Spastic paraplegia 8, autosomal dominant, 603563, Autosomal dominant	NC_000009.12:g.128576916G>A	NC_000009.11:g.131339195G>A	NM_001130438.3:c.745G>A	NP_001123910.1:p.Gly249Arg	Het	rs756177348	Missense	Absent	Absent	Absent	Absent	Absent	D	P	D	23.6	N.A.	N.A.	Absent	Absent	PM2, PP3, BP1	VUS	PM2	VUS	PM2, PP3, BP1	VUS	VUS
17	12-57972045-A-G	AT2521&AT2523	ADCA	KIF5A	Myoclonus, intractable, neonatal, 617235, Autosomal dominant; Spastic paraplegia 10, autosomal dominant, 604187, Autosomal dominant	NC_000012.12:g.57578262A>G	NC_000012.11:g.57972045A>G	NM_004984.4:c.2458A>G	NP_004975.2:p.Ser820Gly	Het	rs766216492	Missense	Absent	3.979e-06	1	Absent	Absent	T	B	D	16.87	N.A.	N.A.	Absent	Absent	PM1, PM2, PP2, BP4	VUS	PM2	VUS	PM1, PM2, PP2, BP4	VUS	VUS
18	5-14485332-A-G	AT1682	ADCA	TRIO	Intellectual developmental disorder, autosomal dominant 44, with microcephaly, 617061, Autosomal dominant; Intellectual developmental disorder, autosomal dominant 63, with macrocephaly, 618825, Autosomal dominant	NC_000005.10:g.14485223A>G	NC_000005.9:g.14485332A>G	NM_007118.4:c.6812A>G	NP_009049.2:p.Glu2271Gly	Het	Absent	Missense	Absent	Absent	Absent	Absent	Absent	D	D	D	23	N.A.	N.A.	Absent	Absent	PM2, PP3, BP1	VUS	PM1, PM2	VUS	PM1, PM2, PP3, BP1	VUS	VUS
19	4-187524910-G-C	AT2176	SPEOCA	FAT1	Spinocerebellar ataxias, N.A., Autosomal dominant	NC_000004.12:g.186603756G>C	NC_000004.11:g.187524910G>C	NM_005245.4:c.10770C>G	NP_005236.2:p.Phe3590Leu	Het	rs576253811	Missense	0.0004	0.0001725	43	Absent	0.002003	D	D	D	26.6	Yes	N.A.	Absent	Absent	PP3, BS1, BP1	Likely benign	PM1, PM2	VUS	PM1, PM2, PP3	VUS	VUS
20	9-135202322-G-C	AT2176	SPEOCA	SETX	Amyotrophic lateral sclerosis 4, juvenile, 602433, Autosomal dominant; Spinocerebellar ataxia, autosomal recessive, with axonal neuropathy 2, 606002, Autosomal recessive	NC_000009.12:g.132326935G>C	NC_000009.11:g.135202322G>C	NM_015046.7:c.4663C>G	NP_055861.3:p.Leu1555Val	Het	rs558075773	Missense	0.000399361	6.774e-05	17	Absent	0.000664	T	B	N	3.048	N.A.	N.A.	Absent	VUS	PM2, BP4	VUS	PM2	VUS	PM2, BP4	VUS	VUS
21	1-203681166-C-T	AT2176	SPEOCA	ATP2B4	Spastic paraplegia	NC_000001.11:g.203712038C>T	NC_000001.10:g.203681166C>T	NM_001684.5:c.2110C>T	NP_001675.3:p.Arg704Trp	Het	rs1437951632	Missense	Absent	3.982e-06	1	Absent	Absent	D	D	D	35	N.A.	N.A.	Absent	Absent	PM2, PP3, BP1	VUS	PM1,PM2,PP3	VUS	PM1, PM2, PP3, BP1	VUS	VUS
22	3-63981756-C-G	AT1756	SPLOCA	ATXN7	Spinocerebellar ataxia 7, 164500, Autosomal dominant	NC_000003.12:g.63996080C>G	NC_000003.11:g.63981756C>G	NM_000333.4:c.2258C>G	NP_000324.1:p.Ser753Cys	Het	rs562913625	Missense	0.0002	6.818e-05	17	Absent	0.002663	T	P	D	24	Yes	0	Absent	Absent	BS1, BS2, BP1	Benign	PM2	VUS	PM2	VUS	VUS
23	14-91780032-G-A	AT2833	SPLOCA	CCDC88C	?Spinocerebellar ataxia 40, 616053, Autosomal dominant	NC_000014.9:g.91313688G>A	NC_000014.8:g.91780032G>A	NM_001080414.4:c.2128C>T	NP_001073883.2:p.Arg710Cys	Het	rs201809611	Missense	0.0002	0.000215	60	Absent	Absent	D	D	D	26.7	Yes	0	Absent	Absent	PM2, PP3, BP1	VUS	PM2	VUS	PM2, PP3	VUS	VUS
24	18-12337480-G-A	AT1941	SPEOCA	AFG3L2	Spinocerebellar ataxia 28, 610246, Autosomal dominant	NC_000018.10:g.12337481G>A	NC_000018.9:g.12337480G>A	NM_006796.2:c.2035C>T	NP_006787.2:p.Arg679Cys	Het	rs551015841	Missense	0.000199681	0.0001432	36	1	Absent	D	D	D	35	Yes	0	Absent	Likely benign	PM2, PP2, PP3, BP6	VUS	PM1, PM2, PP3, BS2, BP6	Likely benign	PM1, PM2, PP2, PP3, BS2, BP6	VUS	VUS
25	1-17326804-T-A	AT2910	ADCA	ATP13A2	Kufor-Rakeb syndrome, 606693, Autosomal recessive; Spastic paraplegia 78, autosomal recessive, 617225, Autosomal recessive	NC_000001.11:g.17000309T>A	NC_000001.10:g.17326804T>A	NM_022089.4:c.844A>T	NP_071372.1:p.Ser282Cys	Het	rs538497077	Missense	0.0002	0.0004454	102	1	0.001997	D	D	D	24.2	Yes	0	CM098008	Likely benign	PM2,PP3,BP1,BP6	Likely Benign	PM1,PM2,PP3,BP6	VUS	PM1,PM2,PP3,BP6	VUS	VUS
Benign variants
26	15-89865073-T-C	AT2037	SPEOCA	POLG	Mitochondrial DNA depletion syndrome 4A (Alpers type), 203700, Autosomal recessive; Mitochondrial DNA depletion syndrome 4B (MNGIE type), 613662, Autosomal recessive; Mitochondrial recessive ataxia syndrome (includes SANDO and SCAE), 607459 (3), Autosomal recessive; Progressive external ophthalmoplegia, autosomal dominant 1, 157640 (3), Autosomal dominant; Progressive external ophthalmoplegia, au…	NC_000015.10:g.89321842T>C	NC_000015.9:g.89865073T>C	NM_002693.2:c.2492A>G	NP_002684.1:p.Tyr831Cys	Het	rs41549716	Missense	0.0022	0.006906	1953	19	0.001997	T	P	A	23.1	Yes	0.00393701	CM043327	Benign	PP2, PP3, BS1, BS2	Benign	PM1, PP5, BS1	VUS	PM1, PP2, PP3, PP5, BS1, BS2	Benign	Benign

## Sheet: Remaining Uncharacterized
S.N.	Patient ID	Group	Gender-Age(onset)	Clinical Features of Patients	MRI Brain	WES Design	Gene	Phenotype, Phenotype MIM Number, Inheritance (OMIM)	HGVS neucleotide change (GRCH38)	HGVS neucleotide change (GRCH37)	HGVS RNA change	HGVS protein change	Disease model (variant state)	Allele state	Variant frequency status	dbSNP ID	Variant Type	Frequency 1000GP	Frequency gnomAD_Total	Number of Het (gnomAD)	Number of Hmz (gnomAD)	Frequency in In-house data	SIFT_pred	Polyphen2_HVAR_pred	MutationTaster_pred	CADD_phred	Sanger validation	Frequency in 257 ethinically matched controls	HGMD status	ClinVar Classification	VarSome (evidence)	VarSome verdict	InterVar automated (evidence)	InterVar automated (Class)	InterVar adjusted (evidence)	InterVar adjusted (class)	Final variant class	Chr-Pos-Ref-Alt
1	AT2257	SPEOCA	M-24 (23)	Gait,dysarthria, nystagmus, dysdiadochokinesia, areflexia,slow saccades, psychiatric, pes cavus, hearing impairment	N.A.	S-WES	SACS	Spastic ataxia, Charlevoix-Saguenay type, 270550, Autosomal recessive	NC_000013.11:g.23336728C>T	NC_000013.10:g.23910867C>T	NM_014363.6:c.7148G>A	NP_055178.3:p.Arg2383His	AR (CHet)	Het	Rare	rs751713432	Missense	Absent	5.59e-05	14	Absent		T	D	D	22.9	Yes	0	Absent	Absent	PM2,PP2,PP3	VUS	PM1,PM2,PP3, BP1	VUS	PM1,PM2,PP3,PP4, BP1	Likely pathogenic	Likely pathogenic	13-23910867-C-T
									NC_000013.11:g.23340893C>A	NC_000013.10:g.23915032C>A	NM_014363.6:c.2983G>T	NP_055178.3:p.Val995Phe		Het	Rare	rs142967124	Missense	0.0018	0.001796	507	4		D	B	N	10.3	Yes	N.A.	Absent	Benign	PP2,BS2,BP6	Benign	PM1,PM2,PP5,BP1,BP4	Likely Benign	PM1,PM2,PP4,PP5,BP1,BP4	VUS	Benign	13-23915032-C-A
2	AT2004	SPLOCA	M-52 (50)	Gait, dysarthria, intention tremor, head tremor, nystagmus,dysdiadochokinesia, bradykinesia,hypermatic saccades , psychiatric involvment	Cerebellar and cerebral atrophy (b/l) and dilatation of IV ventricle	S-WES	TTBK2	Spinocerebellar ataxia 11, 604432, Autosomal dominant	NC_000015.10:g.42753075C>T	NC_000015.9:g.43045273C>T	NM_173500.4:c.2171G>A	NP_775771.3:p.Gly724Glu	AD	Het	Rare	rs201524659	Missense	0.0008	0.0006129	170	1		D	P	D	22.5	Yes	0.00423729	Absent	Likely benign	BS1, BS2, BP1, BP4, BP6,	Benign	BS2, BP6	Likely Benign	BS1, BS2, BP1, BP6,	Benign	Benign	15-43045273-C-T
3	AT2027	SPLOCA	F-49 (48.25)	Gait, intetion tremor, dysarthria, bradykinesia, broken pursuit	Mild cerebellar atrophy	S-WES	CCDC88C	Spinocerebellar ataxia 40, 616053, Autosomal dominant	NC_000014.9:g.91313541G>A	NC_000014.8:g.91779885G>A	NM_001080414.4:c.2275C>T	NP_001073883.2:p.Leu759Phe	AD	Het	Rare	rs558480299	Missense	0.0004	0.0002991	83	0		D	B	D	22.9	Yes	0.0019685	Absent	Absent	PM2,BP1	VUS	PM2	VUS	PM2,PP3	VUS	Benign	14-91779885-G-A
